# Supplementary material for: Sparingly fluorinated maltoside-based surfactants for membrane-protein stabilization
Source: Royal Society of Chemistry journal article supplement (doi:10.1039/c5nj03502c), 2016-01-01
Supplement: c5nj03502c1.pdf [file c5nj03502c1.pdf]

## Sparingly fluorinated maltoside-based surfactants for membrane-protein stabilization

Ange Polidori,<sup>a</sup> Simon Raynal,<sup>a</sup> Laurie-Anne Barret,<sup>a,b</sup> Mohamed Dahani,<sup>a</sup> Cherone Barrot-Ivolot,<sup>a</sup> Colette Jungas,<sup>b</sup> Erik Frotscher,<sup>c</sup> Sandro Keller,<sup>c</sup> Christine Ebel,<sup>d,e,f</sup> Cécile Breyton,<sup>d,e,f</sup> & Françoise Bonneté<sup>a\*</sup>

<sup>a</sup> Institut des Biomolécules Max Mousseron (IBMM) UMR 5247 CNRS-UM-ENSCM, Chimie BioOrganique et Systèmes Amphiphiles, Université d'Avignon, 301, rue Baruch de Spinoza, F84000 Avignon, France

<sup>b</sup> Laboratoire de Génétique et de Biophysique des Plantes (L.G.B.P) UMR 7265 CNRS-CEA-AMU, Faculté des Sciences de Luminy, 163 avenue de Luminy, F-13009 Marseille, France

<sup>c</sup> Molecular Biophysics, University of Kaiserslautern, Erwin-Schrödinger-Str. 13, 67663 Kaiserslautern, Germany.

<sup>d</sup> Université Grenoble Alpes, IBS, F-38044 Grenoble, France.

<sup>e</sup> CNRS, IBS, F-38044 Grenoble, France.

<sup>f</sup> CEA, IBS, F-38044 Grenoble, France

### Content

<sup>1</sup>H NMR, <sup>19</sup>F NMR, and <sup>13</sup>C NMR spectra for all compounds

Figure S1: Superposition of selected experimental and fitted sedimentation velocity profiles

Figure S2: Autocorrelation functions  $G(t)$  and size distributions weighted by intensity or volume for F<sub>2</sub>H<sub>9</sub>βM, F<sub>4</sub>H<sub>5</sub>βM, and F<sub>6</sub>H<sub>2</sub>βM in water

Figure S3: SAXS patterns and pair distribution functions for F<sub>2</sub>H<sub>9</sub>βM, F<sub>4</sub>H<sub>5</sub>βM, and F<sub>6</sub>H<sub>2</sub>βM in water

Figure S4: Forward intensity  $I(0)$  as a function of total surfactant concentration for F<sub>2</sub>H<sub>9</sub>βM, F<sub>4</sub>H<sub>5</sub>βM, and F<sub>6</sub>H<sub>2</sub>βM for CMC determination

Table S1: Summary of surfactant properties

# $^1\text{H}$ NMR, $^{19}\text{F}$ NMR and $^{13}\text{C}$ NMR of compound 1

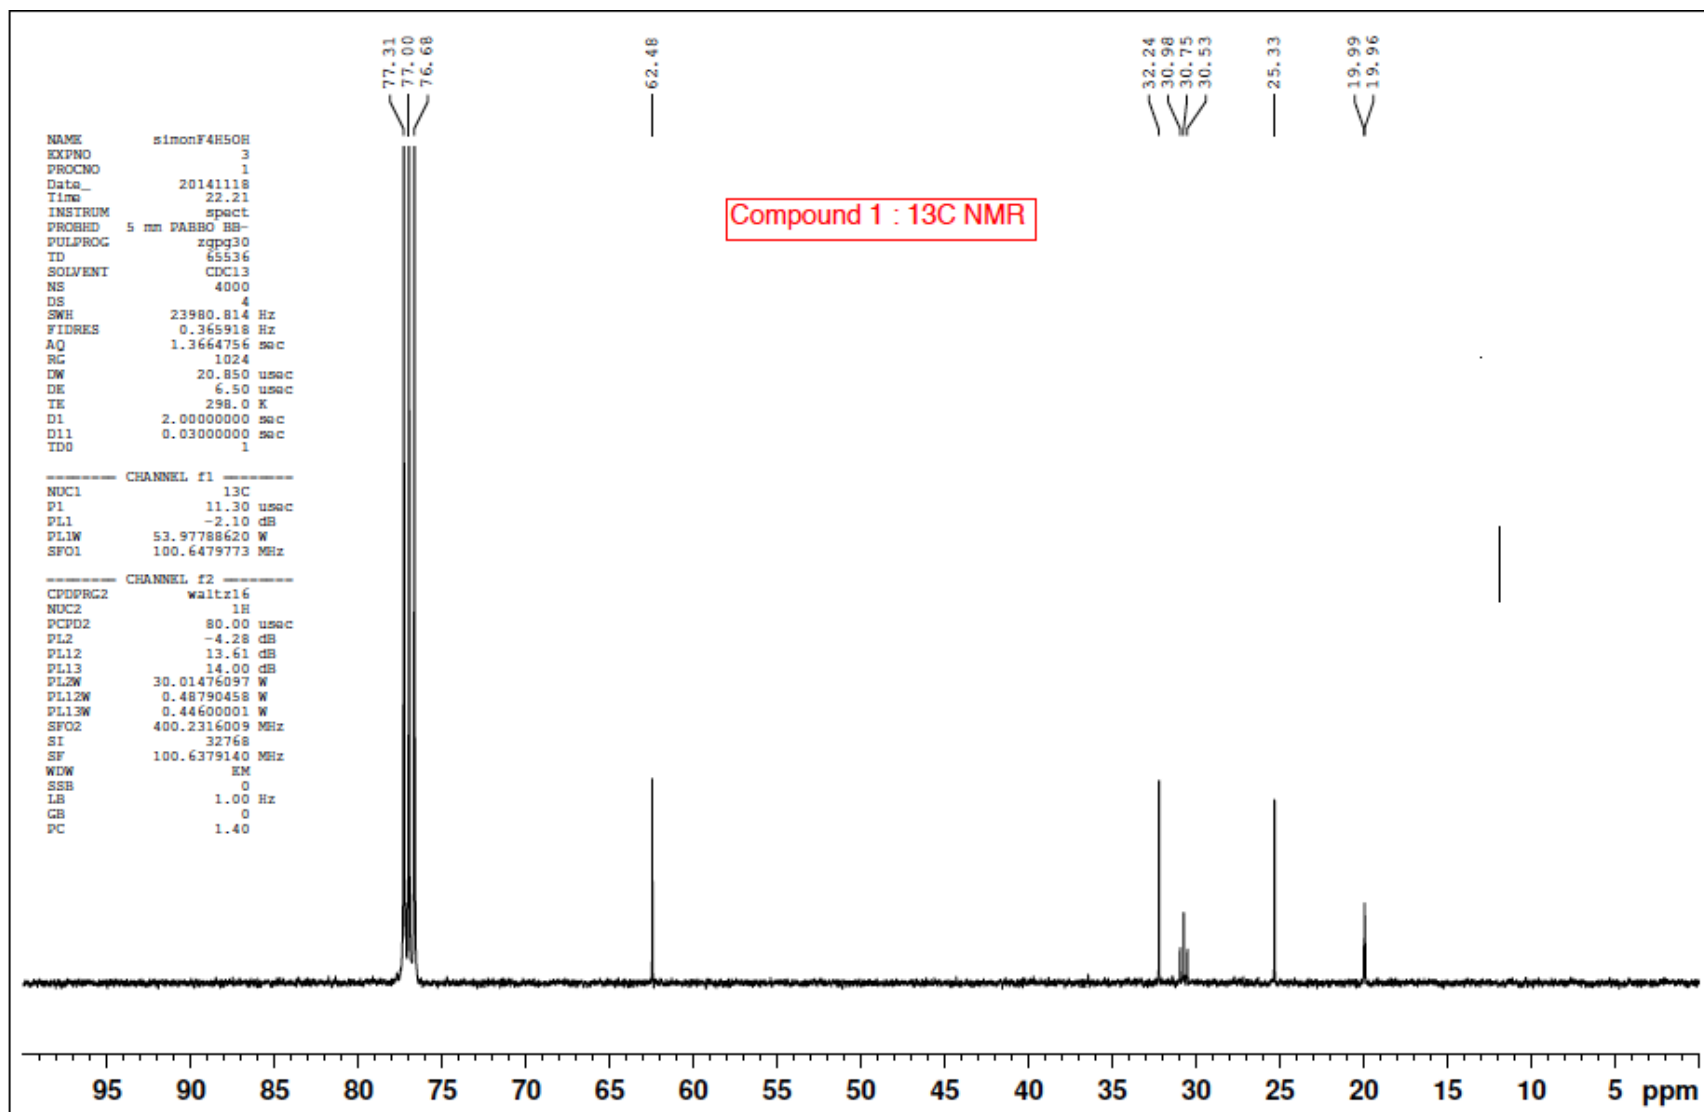

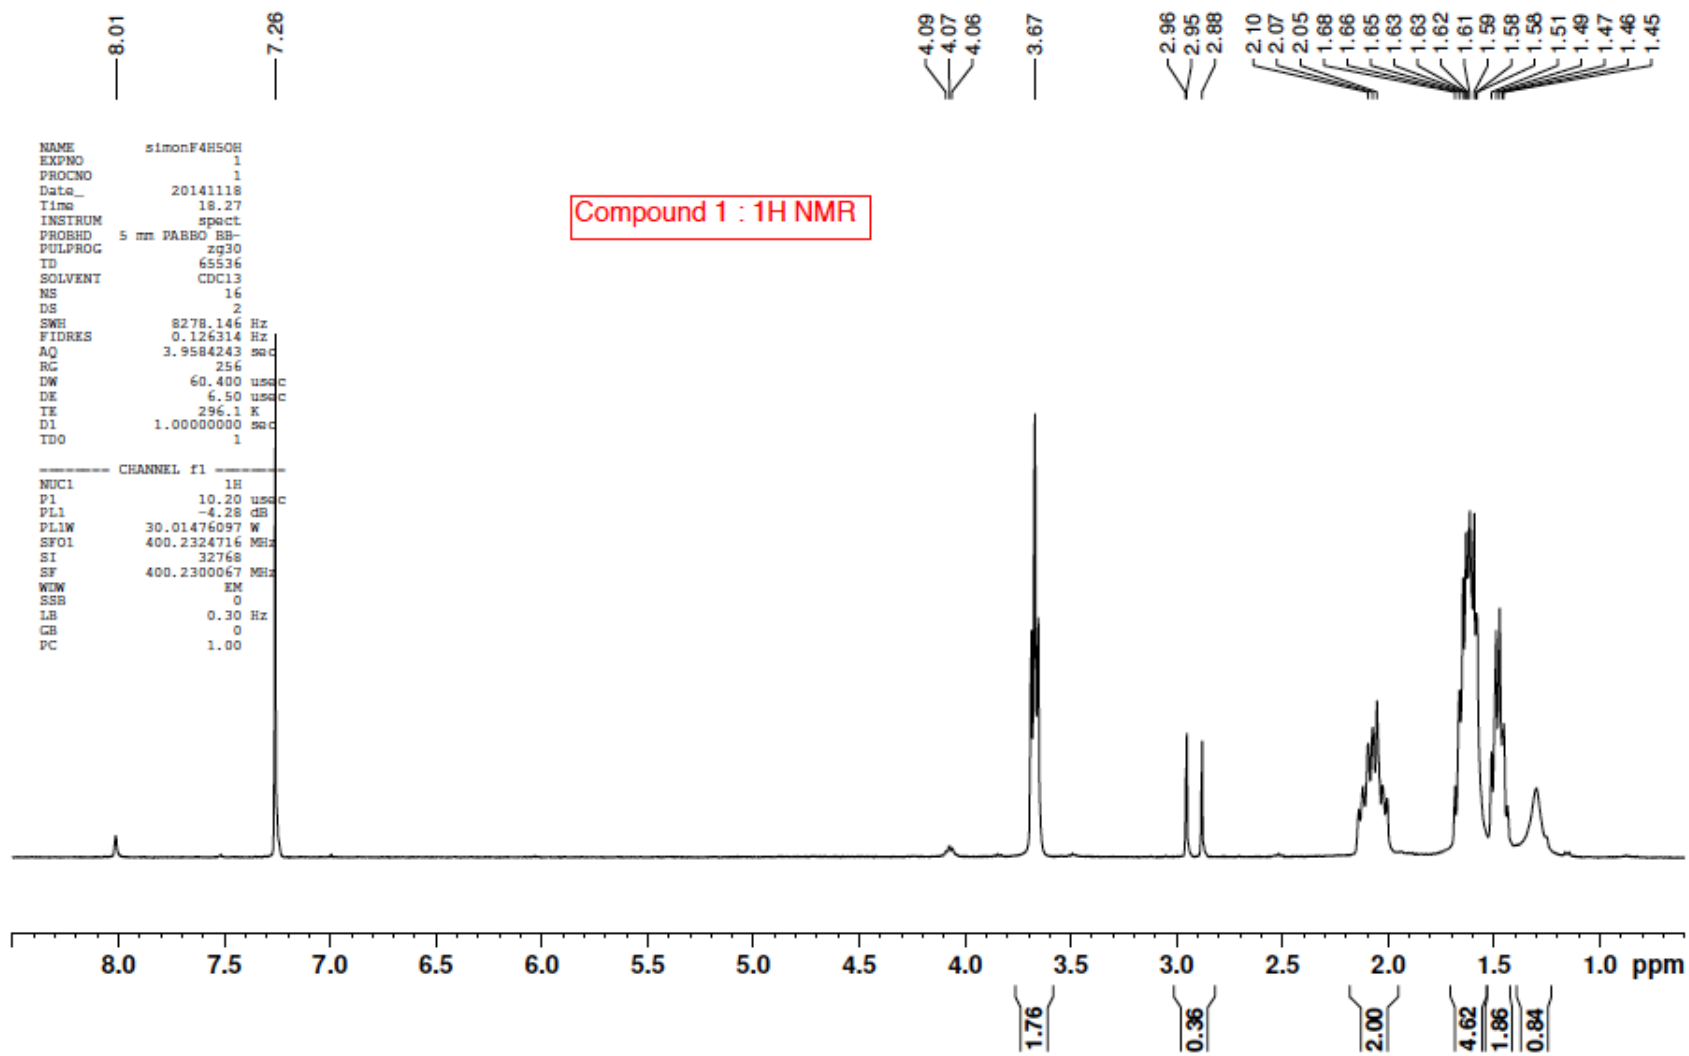

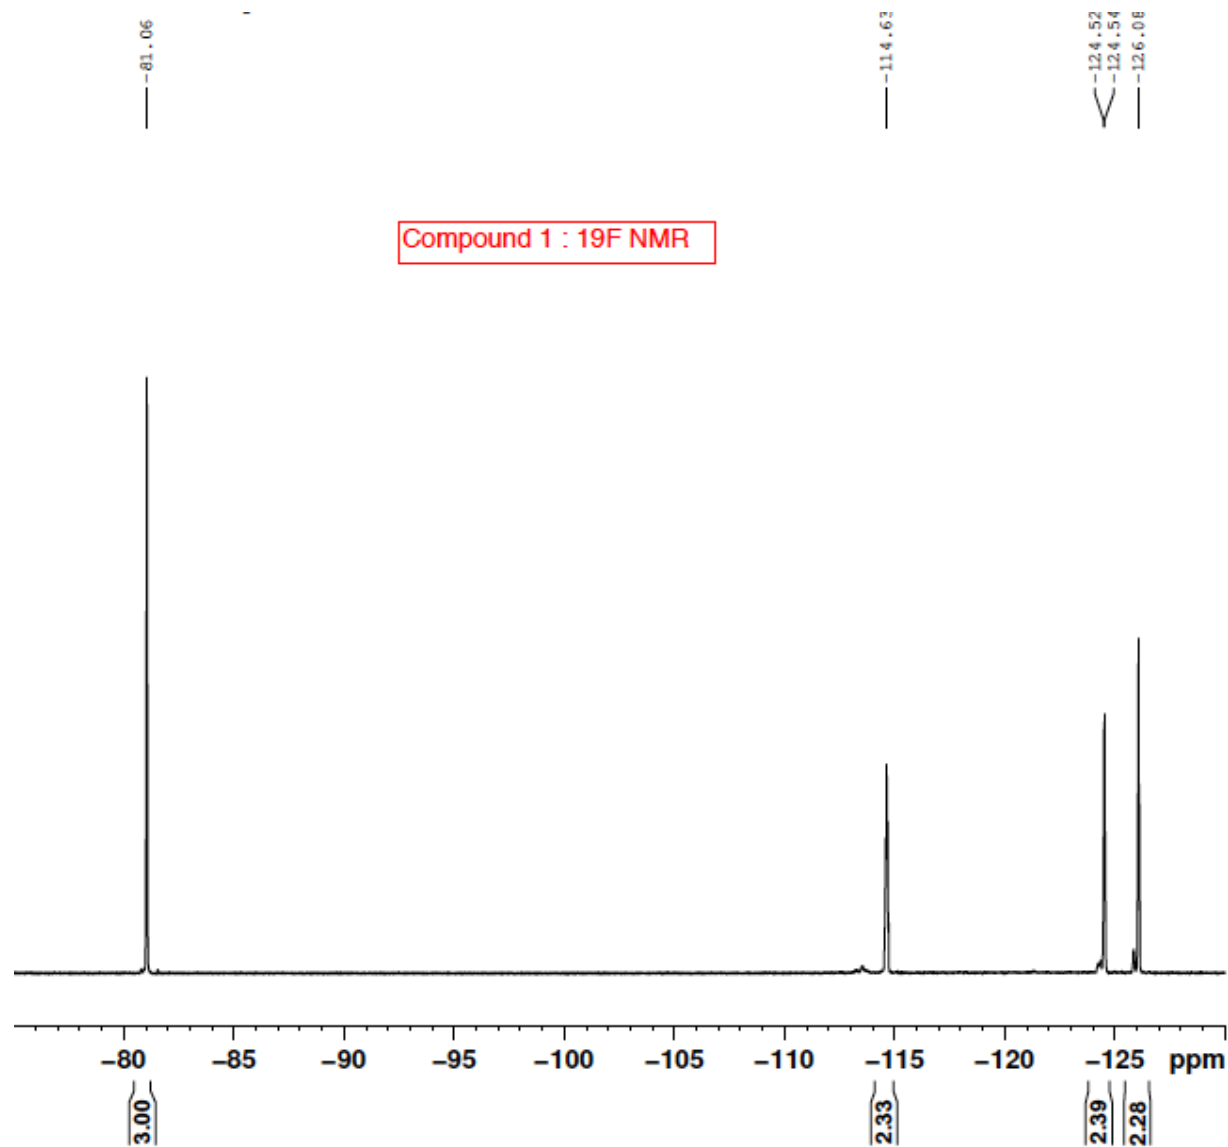

```
NAME      simonF4H5OH
EXPNO     2
PROCNO    1
Date_     20141118
Time      18.30
INSTRUM   spect
PROBHD    5 mm PABBO BB-
PULPROG   zgfg1qn
ID        131072
SOLVENT   CDC13
NS        16
DS        4
SWH       75187.969 Hz
FIDRES    0.573639 Hz
AQ        0.8716788 sec
RG        574.7
DW        6.650 usec
DE        6.50 usec
TE        296.1 K
D1        1.00000000 sec
ID0       1
```

```
----- CHANNEL f1 -----
NUC1      19F
P1        14.00 usec
PL1       -3.00 dB
PL1W      24.80876732 W
SFO1     376.5548010 MHz
SI        65536
SF        376.5924600 MHz
WDW       EM
SSB       0
LB        0.30 Hz
GB        0
PC        1.00
```

**$^1\text{H}$  NMR,  $^{19}\text{F}$  NMR and  $^{13}\text{C}$  NMR of compound 2**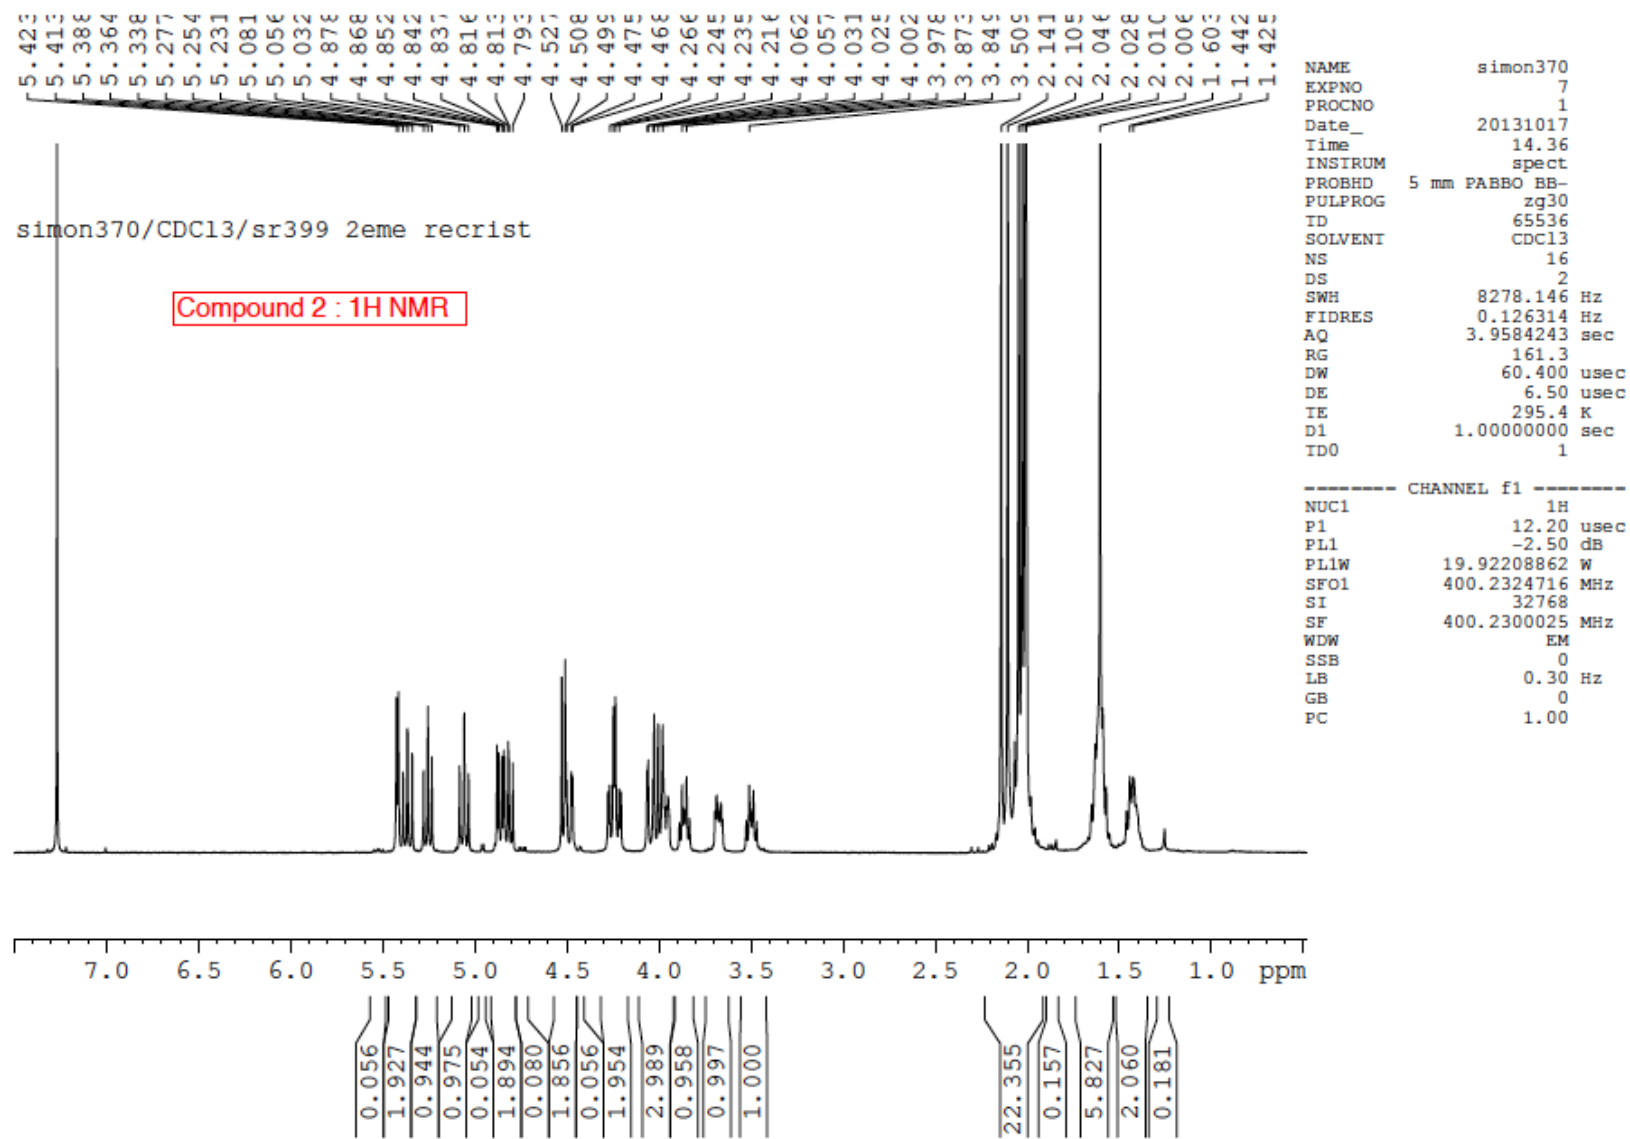

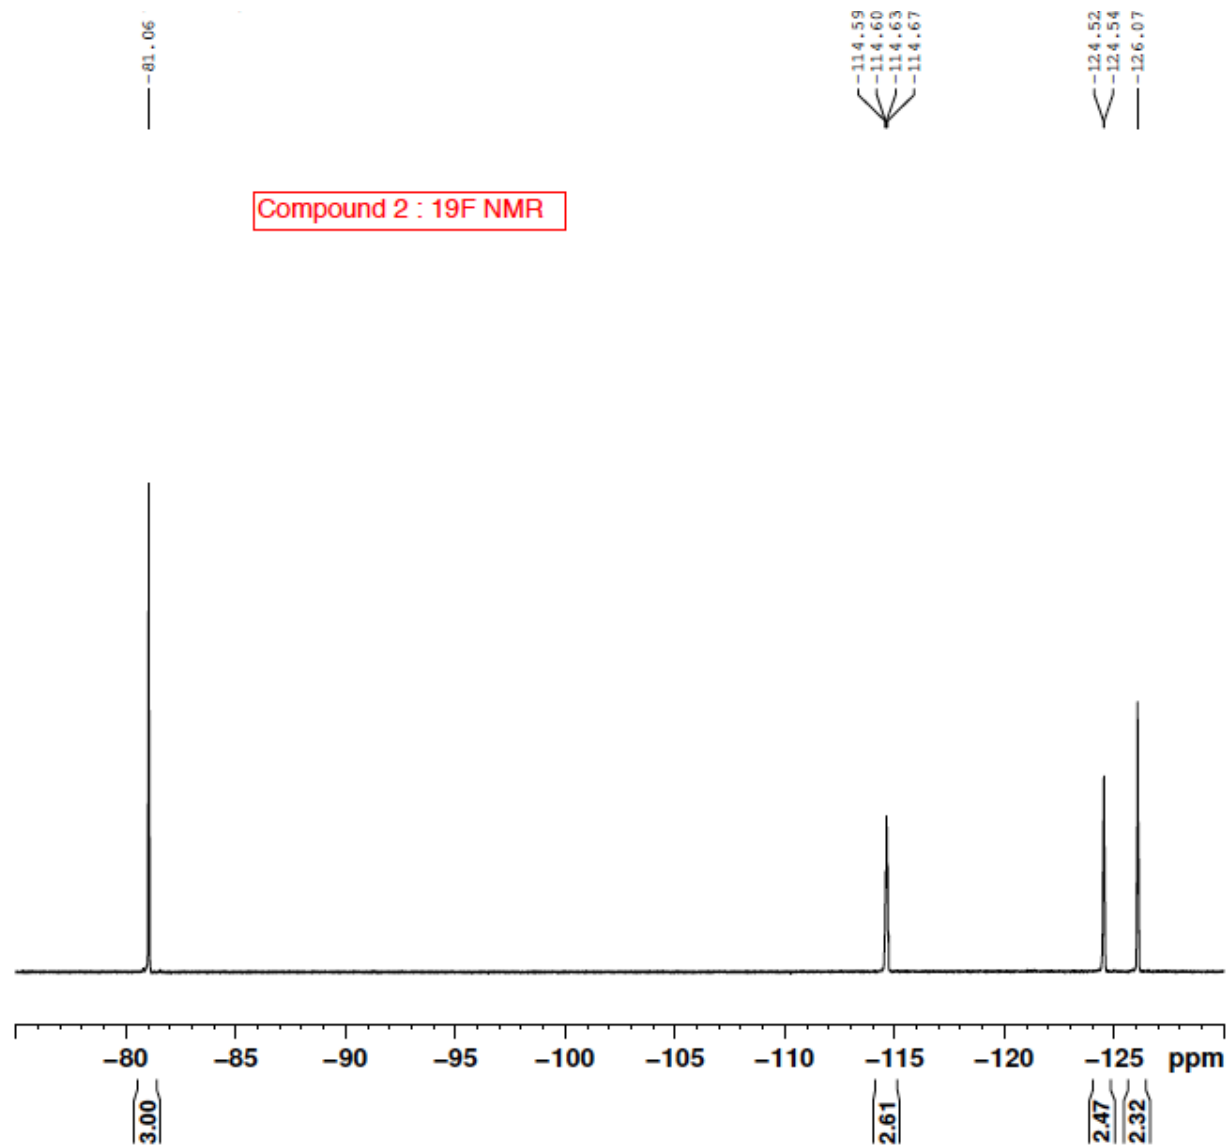

```

NAME          simon370
EXPNO         8
PROCNO        1
Date_         20131017
Time          14.38
INSTRUM       spect
PROBHD        5 mm PABBO BB-
PULPROG       zgfgqn
ID            131072
SOLVENT       CDCl3
NS            16
DS            4
SWH           75187.969 Hz
FIDRES        0.573639 Hz
AQ            0.8716788 sec
RG            574.7
DW            6.650 usec
DE            6.50 usec
TE            295.5 K
D1            1.00000000 sec
ID0           1

```

```

----- CHANNEL f1 -----
NUC1          19F
P1            14.00 usec
PL1           -3.00 dB
PL1W         24.80876732 W
SFO1         376.5548010 MHz
SI            65536
SF           376.5924600 MHz
WDW           EM
SSB           0
LB            0.30 Hz
GB            0
PC            1.00

```

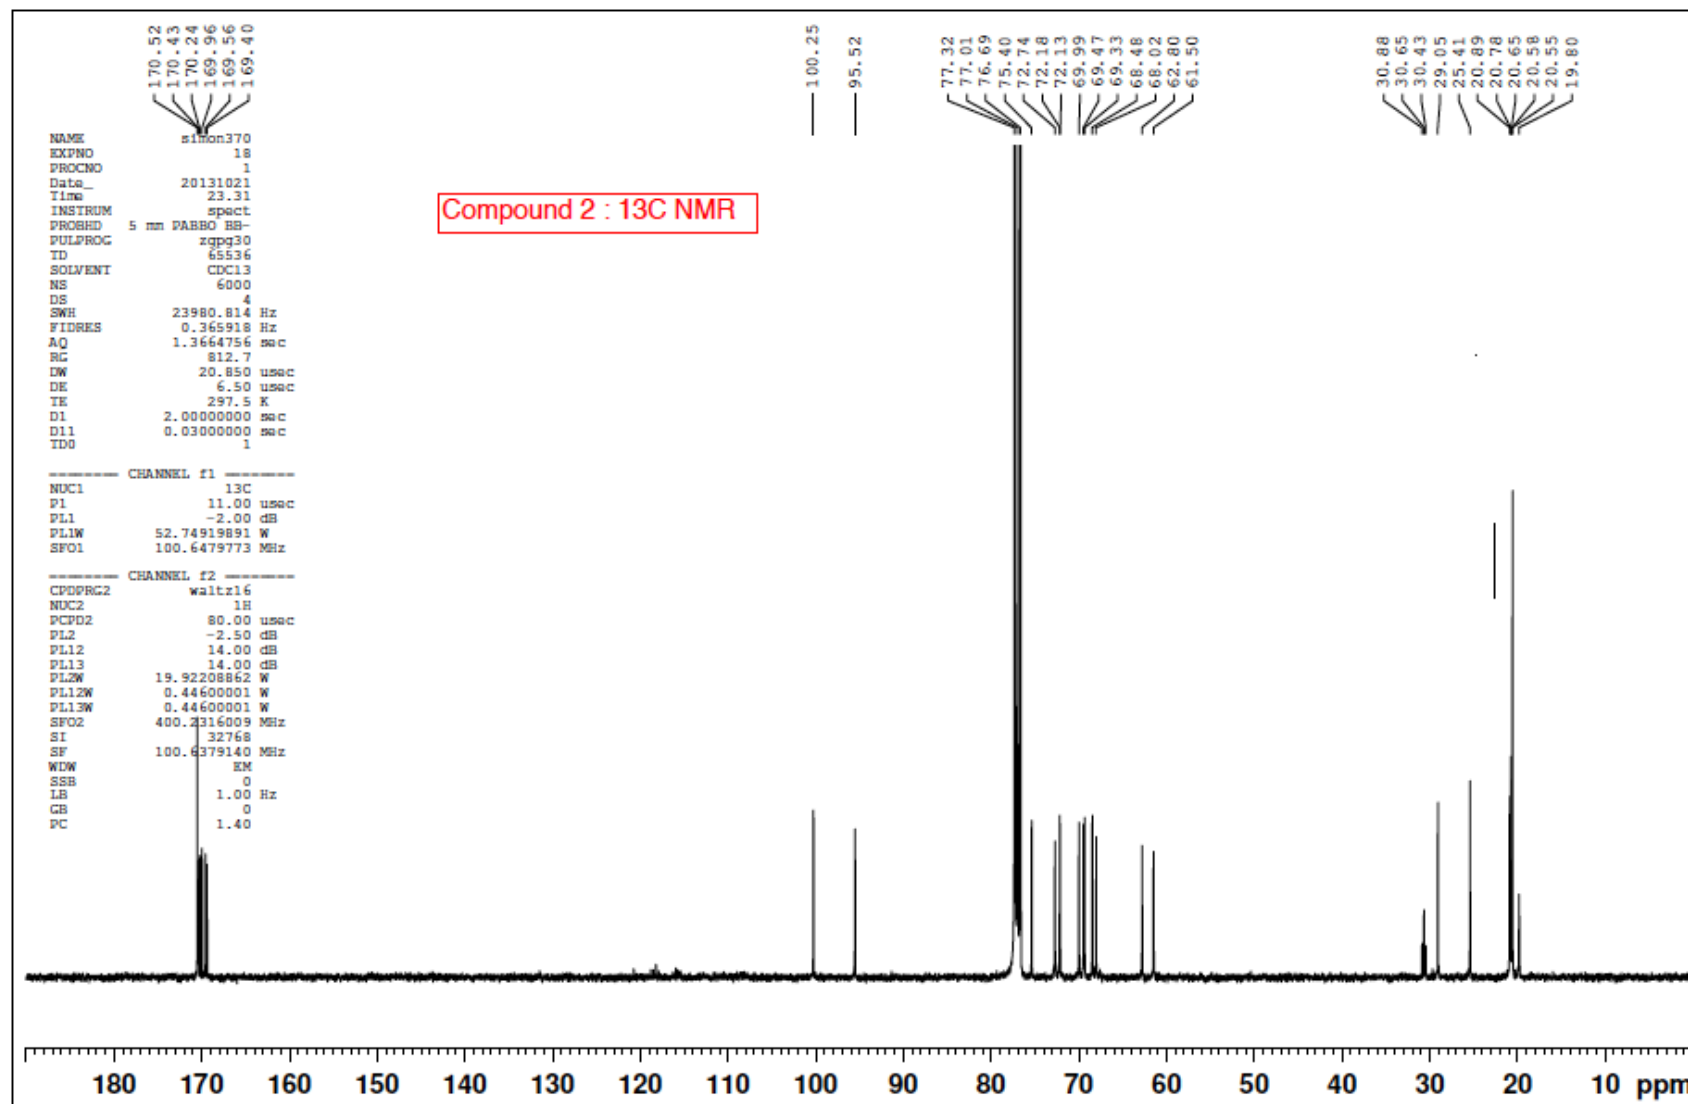

**$^1\text{H}$  NMR,  $^{19}\text{F}$  NMR and  $^{13}\text{C}$  NMR of F4H5Malt**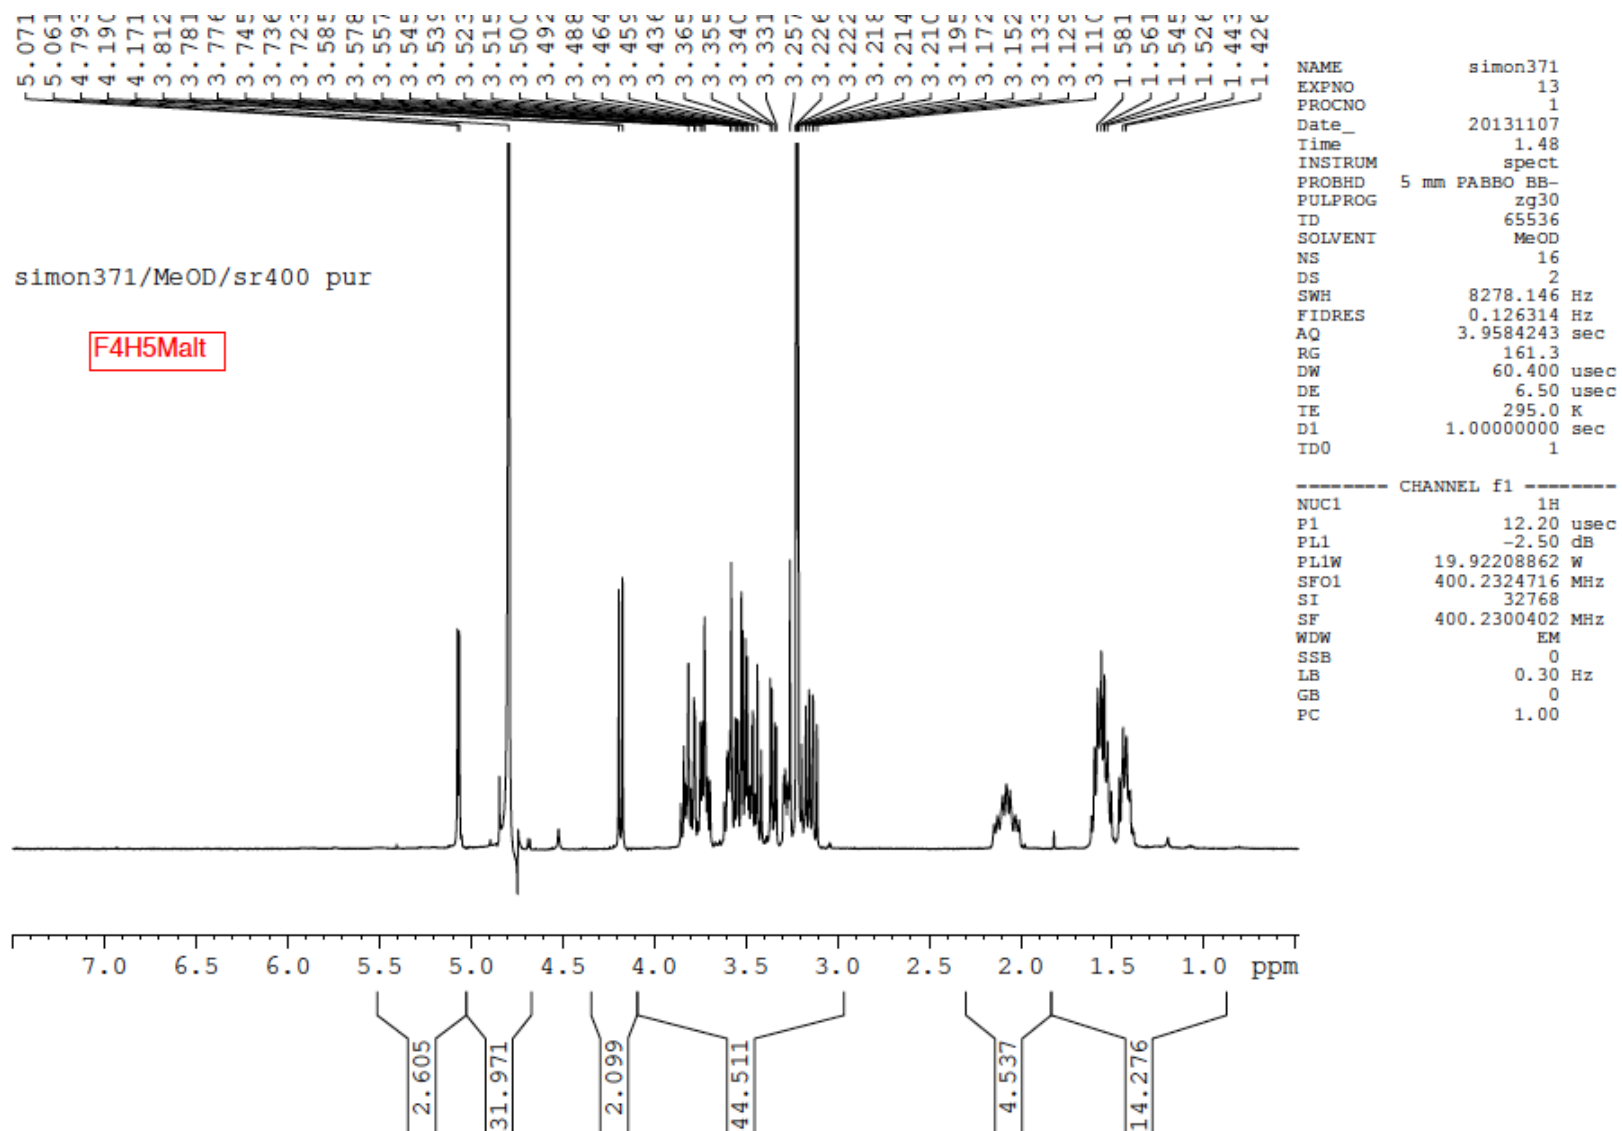



simon371/MeOD/sr400 pur

F4H5Malt

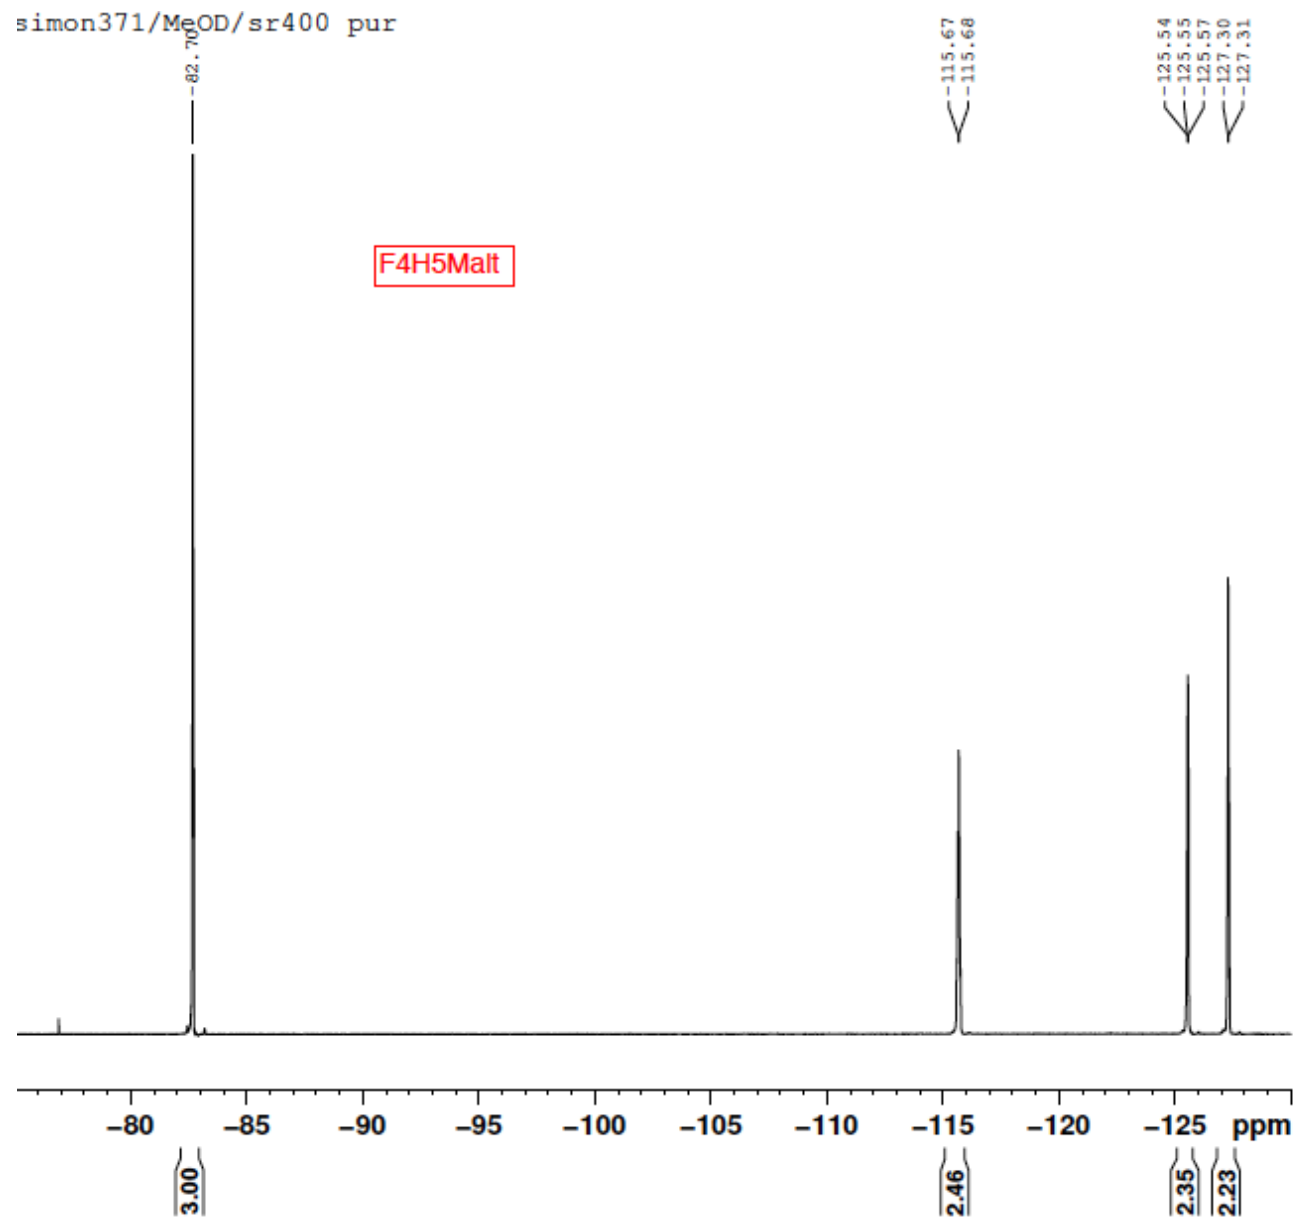

```

NAME          simon371
EXPNO         8
PROCNO        1
Date_         20131024
Time          18.29
INSTRUM       spect
PROBHD        5 mm PABBO BB-
PULPROG       zgflqn
ID            131072
SOLVENT       MeOD
NS            16
DS            4
SWH           75187.969 Hz
FIDRES        0.573639 Hz
AQ            0.8716788 sec
RG            362
DW            6.650 usec
DE            6.50 usec
TE            295.8 K
D1            1.00000000 sec
TD0           1

```

```

----- CHANNEL f1 -----
NUC1          19F
P1            14.00 usec
PL1           -3.00 dB
PL1W         24.80876732 W
SFO1         376.5548010 MHz
SI            65536
SF           376.5924600 MHz
WDW           EM
SSB           0
LB            0.30 Hz
GB            0
PC            1.00

```

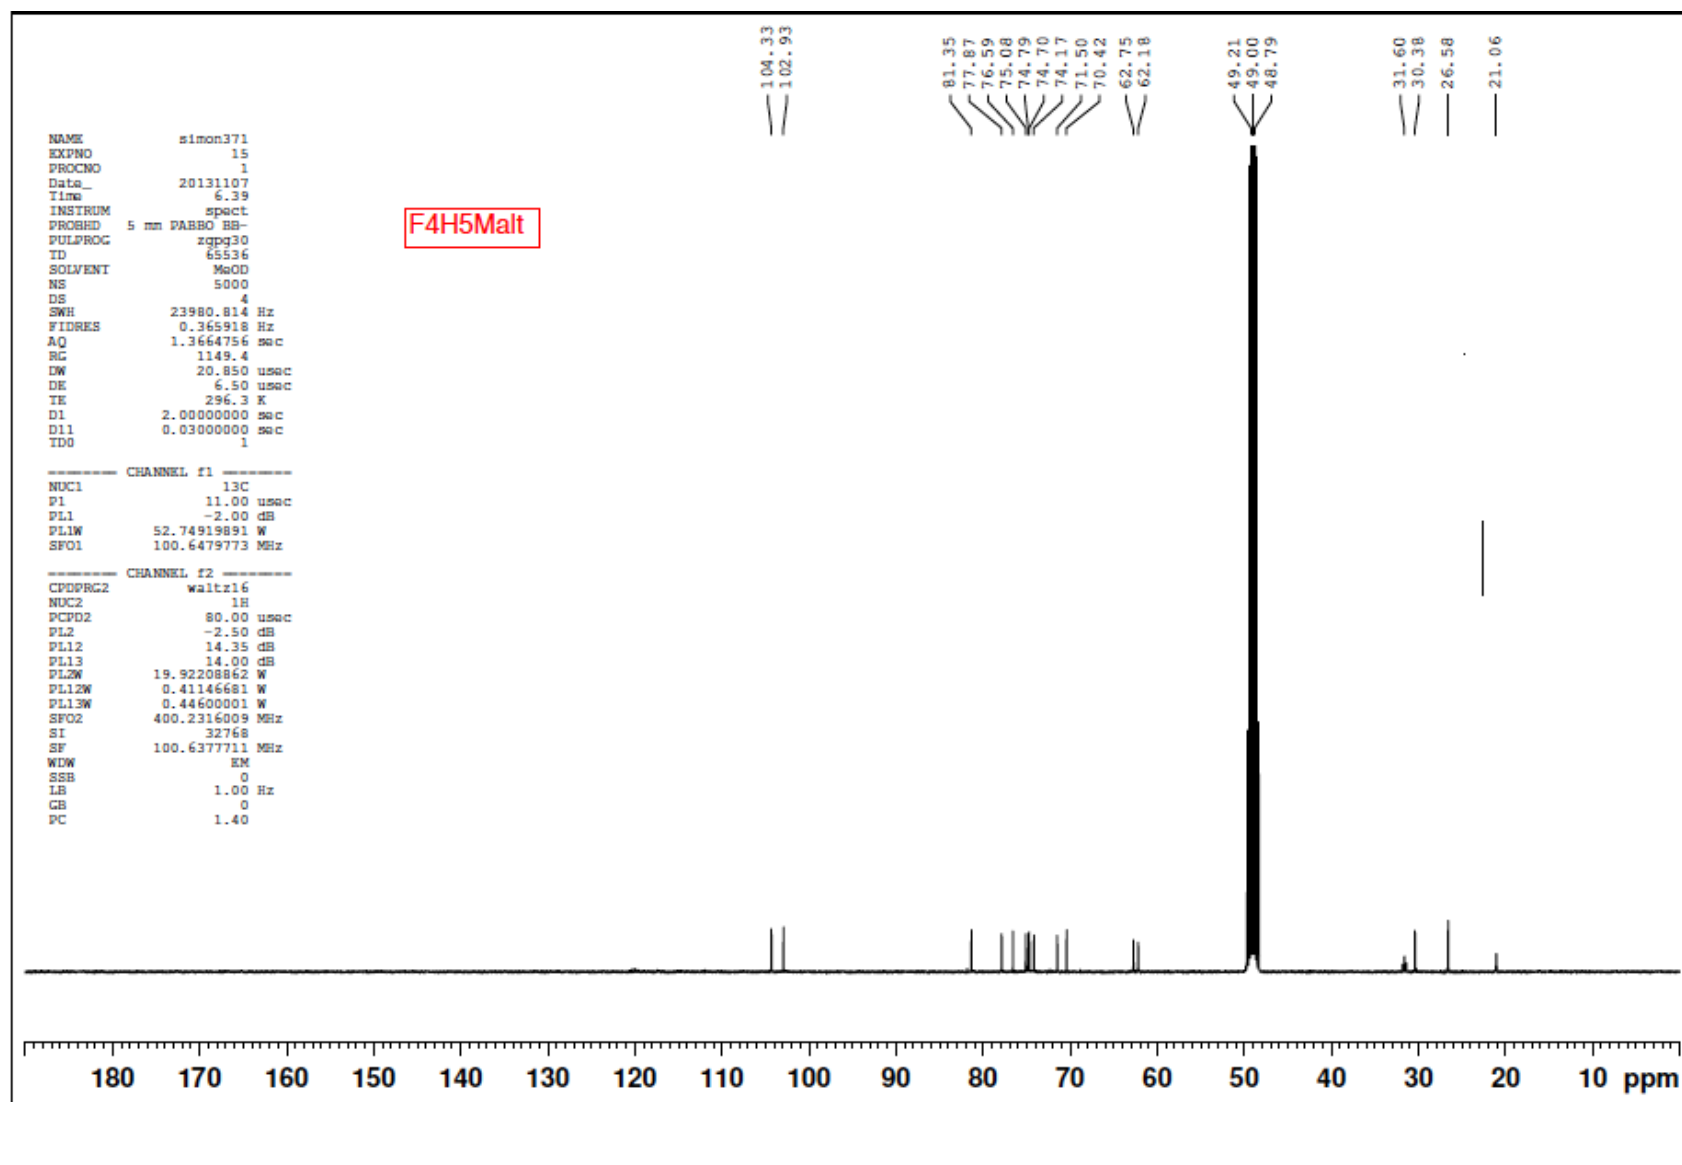

**$^1\text{H}$  NMR and  $^{13}\text{C}$  NMR of compound 3**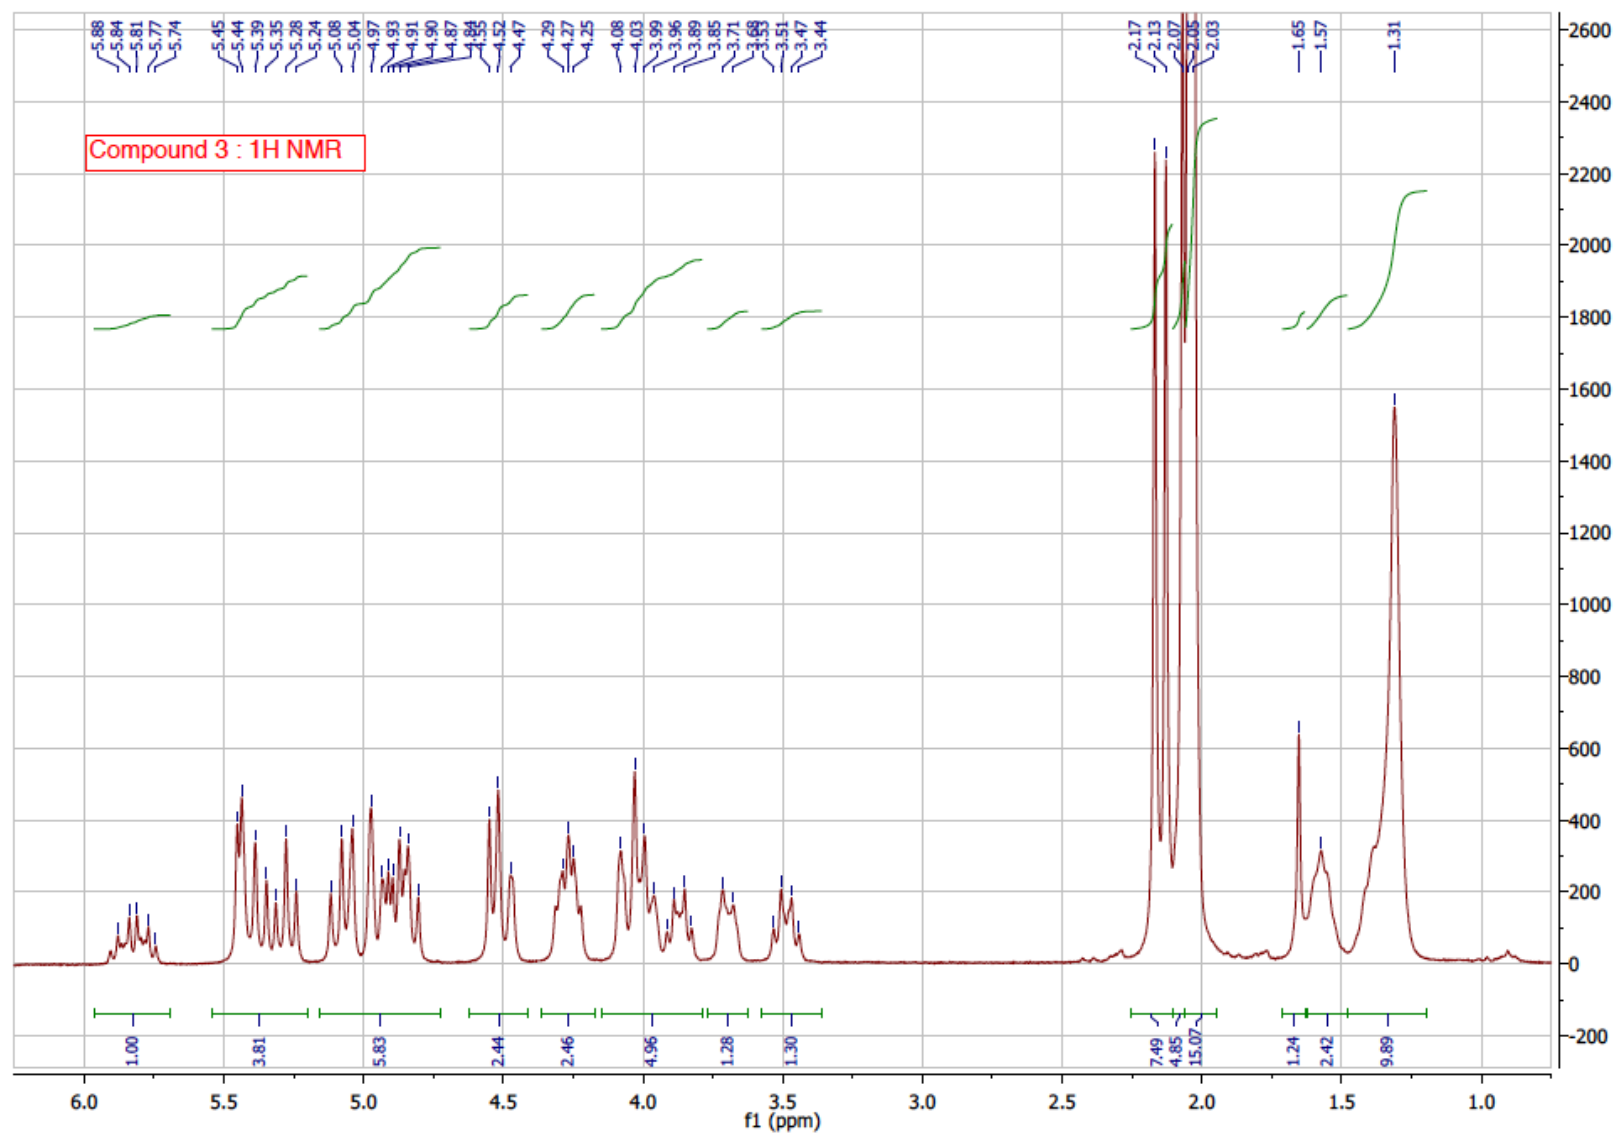

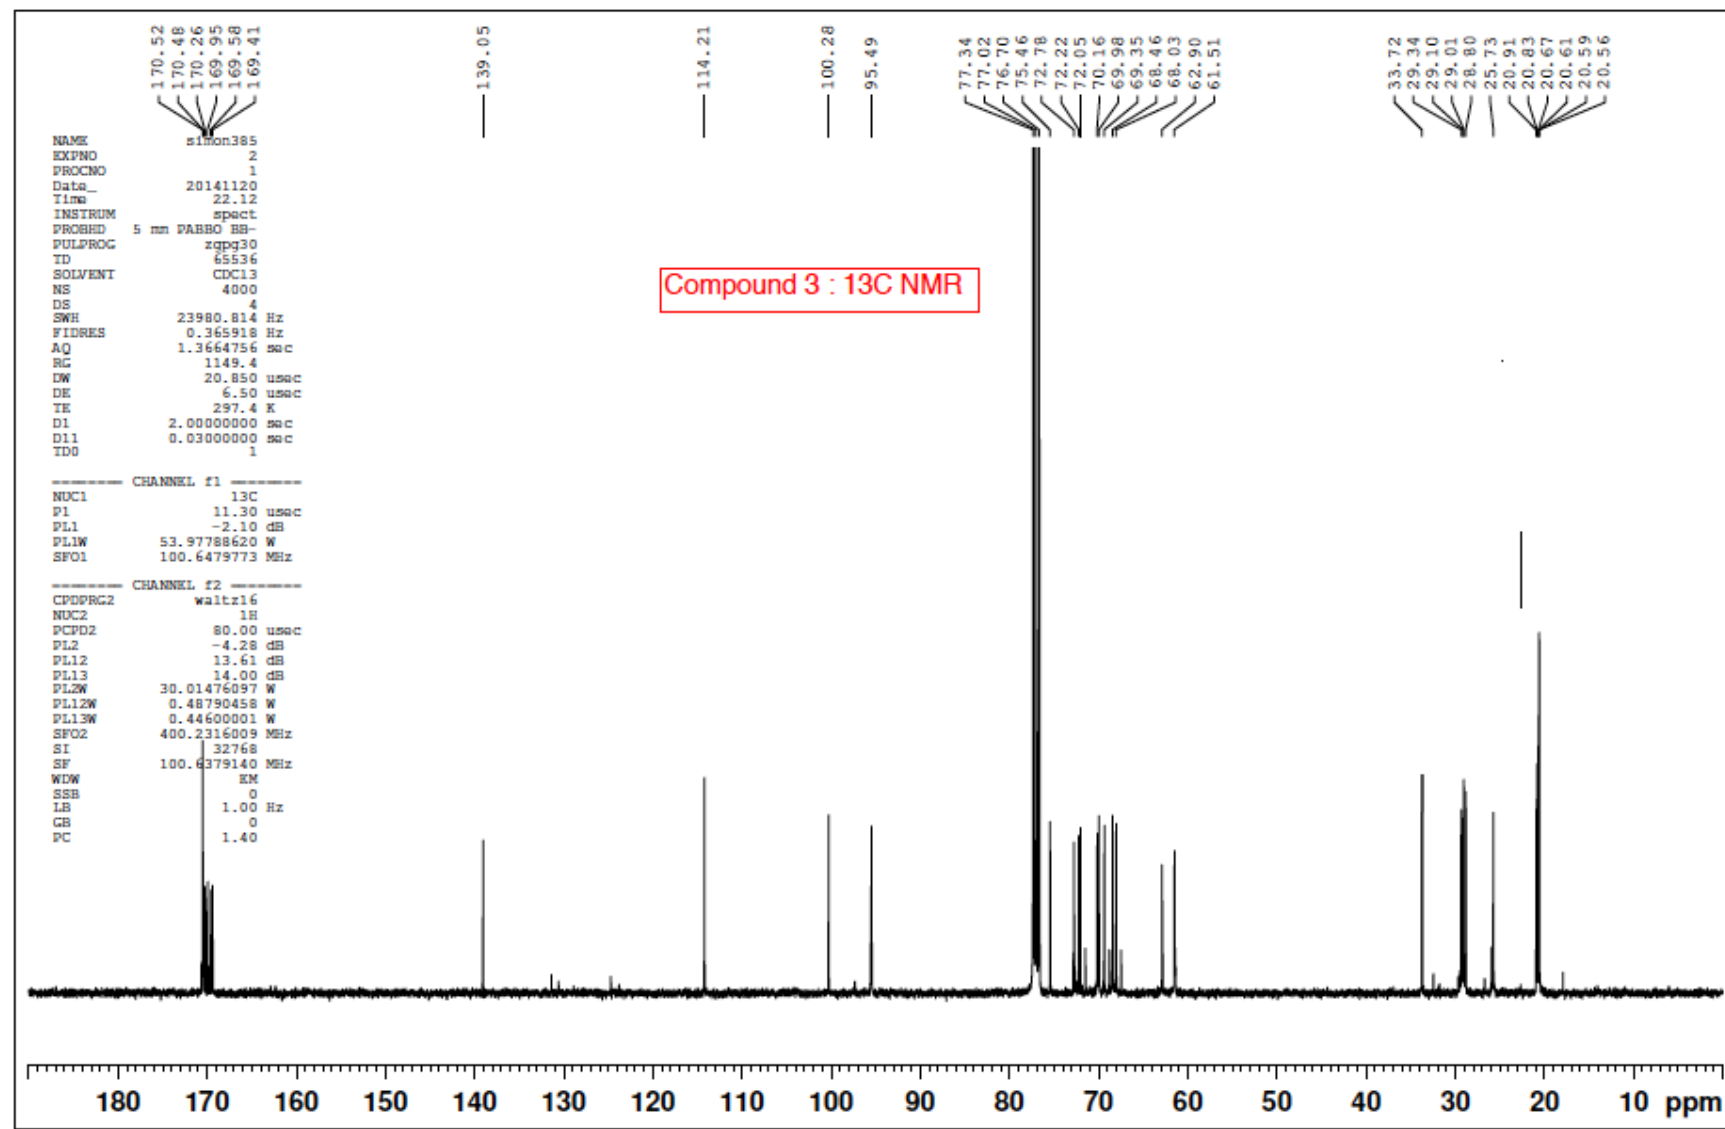

**$^1\text{H}$  NMR,  $^{19}\text{F}$  NMR and  $^{13}\text{C}$  NMR of compound 4**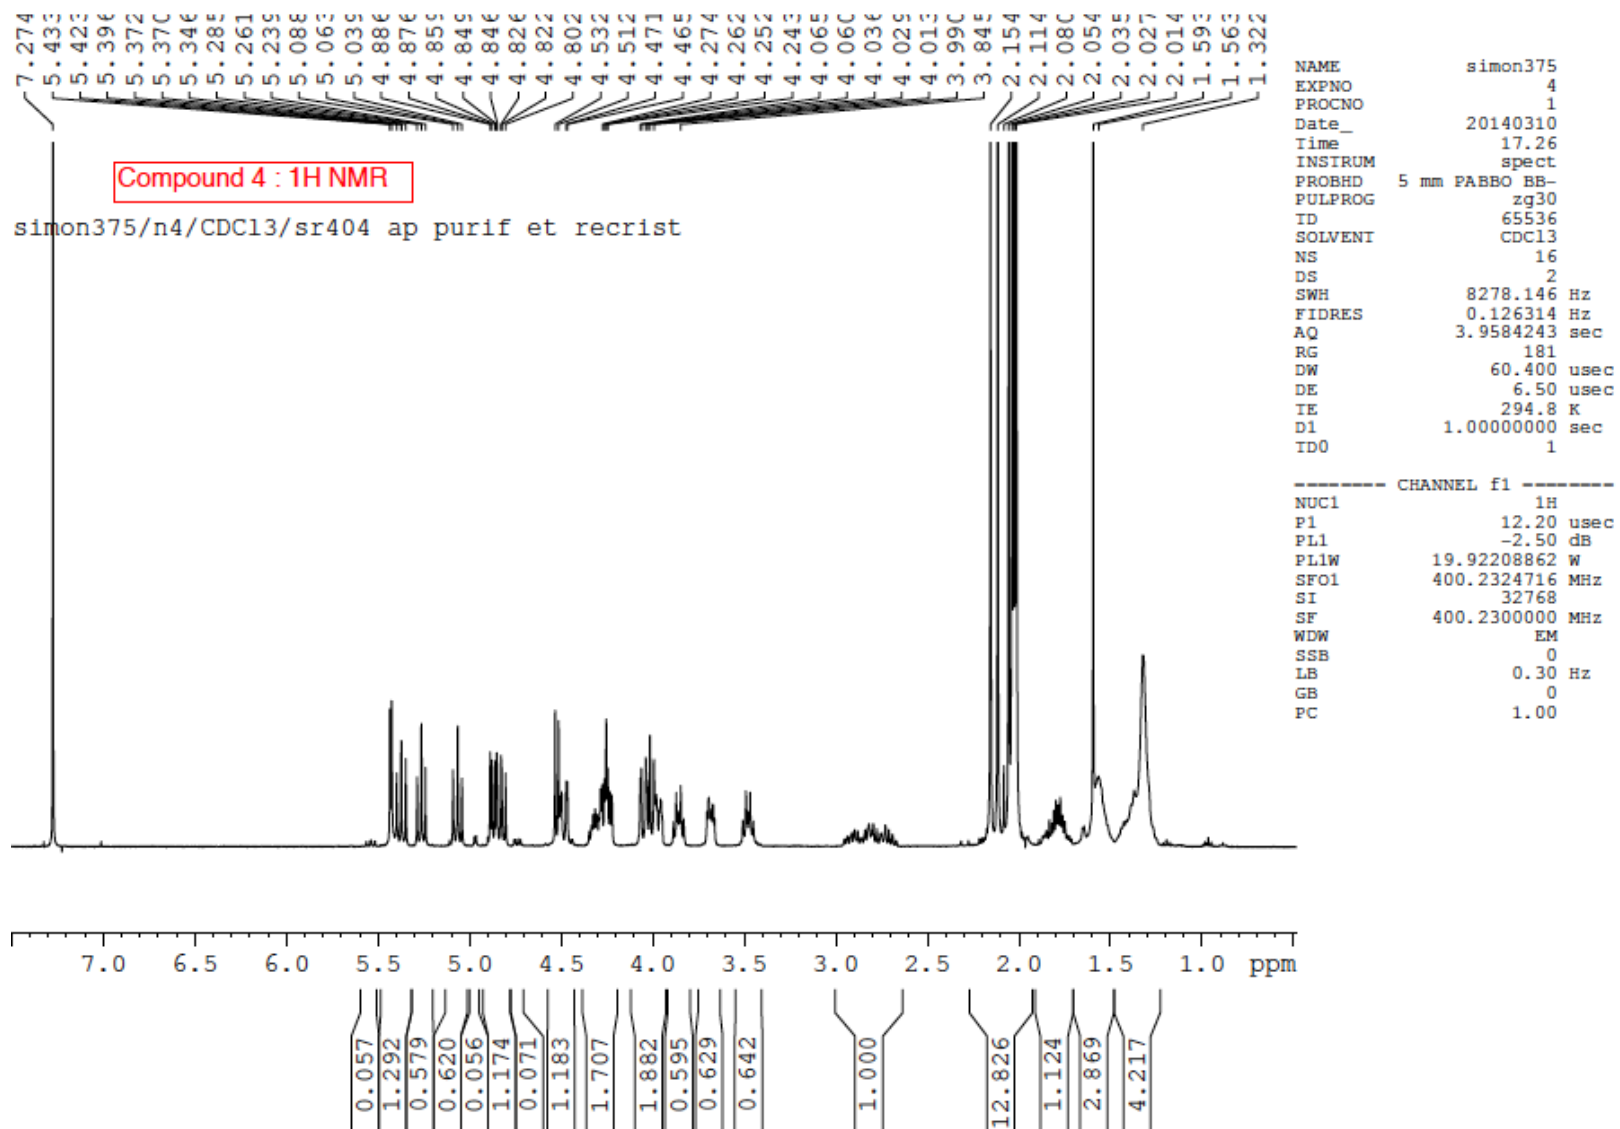

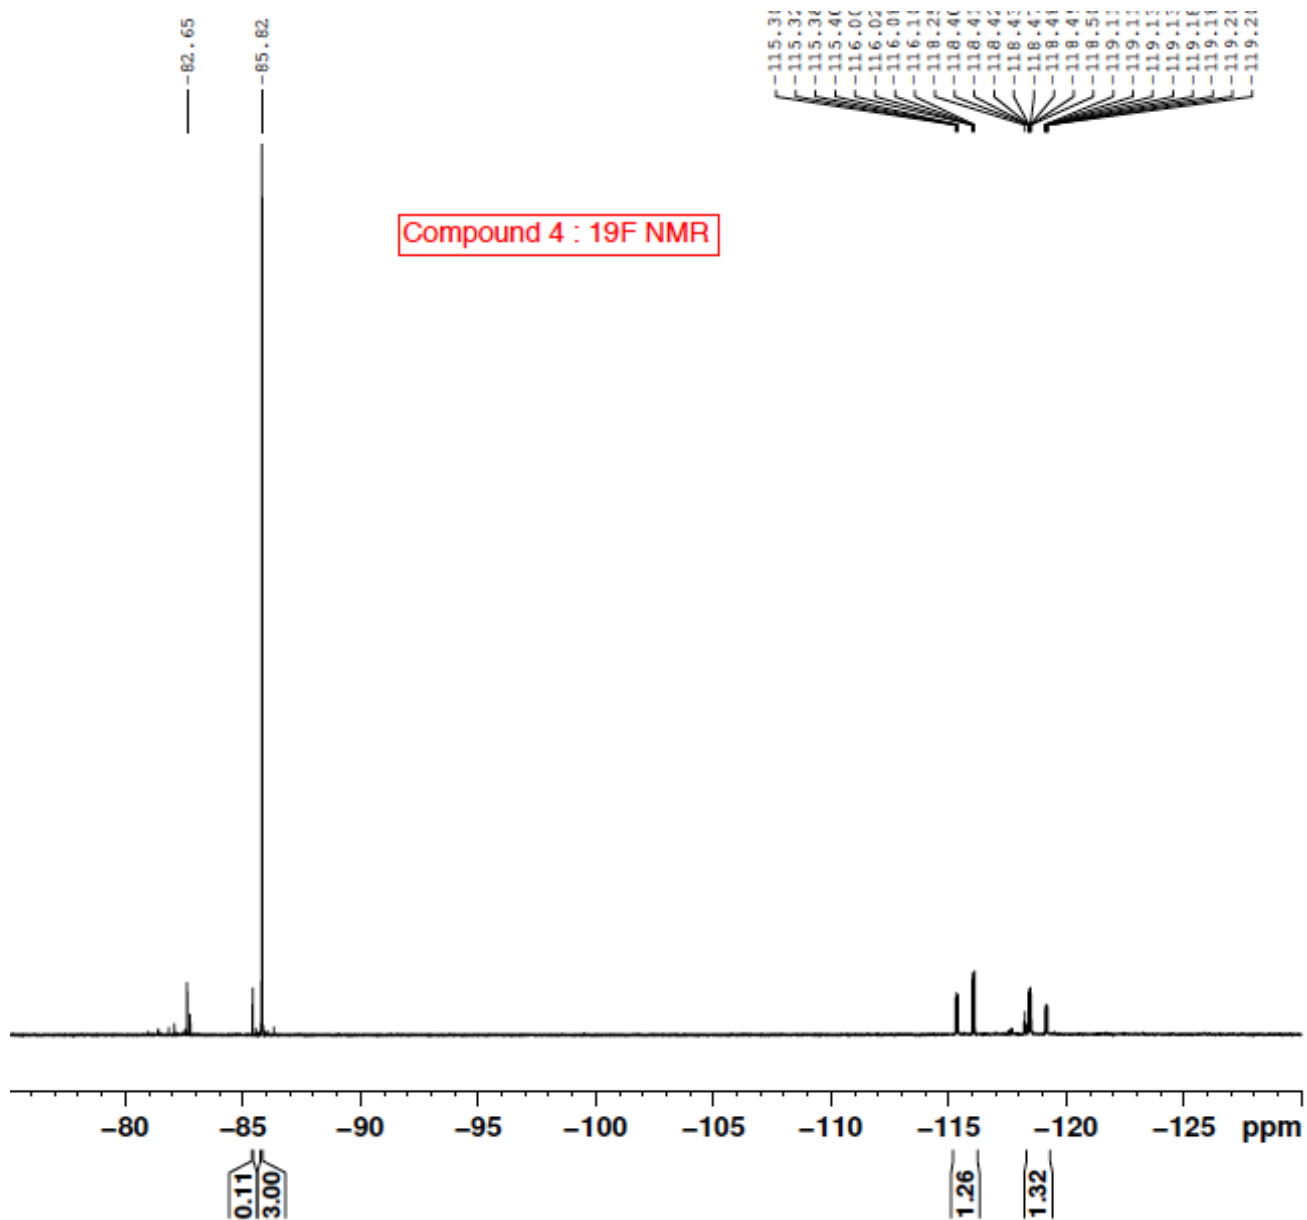

```

NAME          simon375
EXPNO         5
PROCNO        1
Date_         20140310
Time          17.37
INSTRUM       spect
PROBHD        5 mm PABBO BB-
PULPROG       zgfgn
ID            131072
SOLVENT       CDC13
NS            16
DS            4
SWH           75187.969 Hz
FIDRES        0.573639 Hz
AQ            0.8716788 sec
RG            574.7
DW            6.650 usec
DE            6.50 usec
TE            294.7 K
D1            1.00000000 sec
ID0           1
  
```

```

----- CHANNEL f1 -----
NUC1          19F
P1            14.00 usec
PL1           -3.00 dB
PL1W          24.80876732 W
SFO1          376.5548010 MHz
SI            65536
SF            376.5924600 MHz
WDW           EM
SSB           0
LB            0.30 Hz
GB            0
PC            1.00
  
```

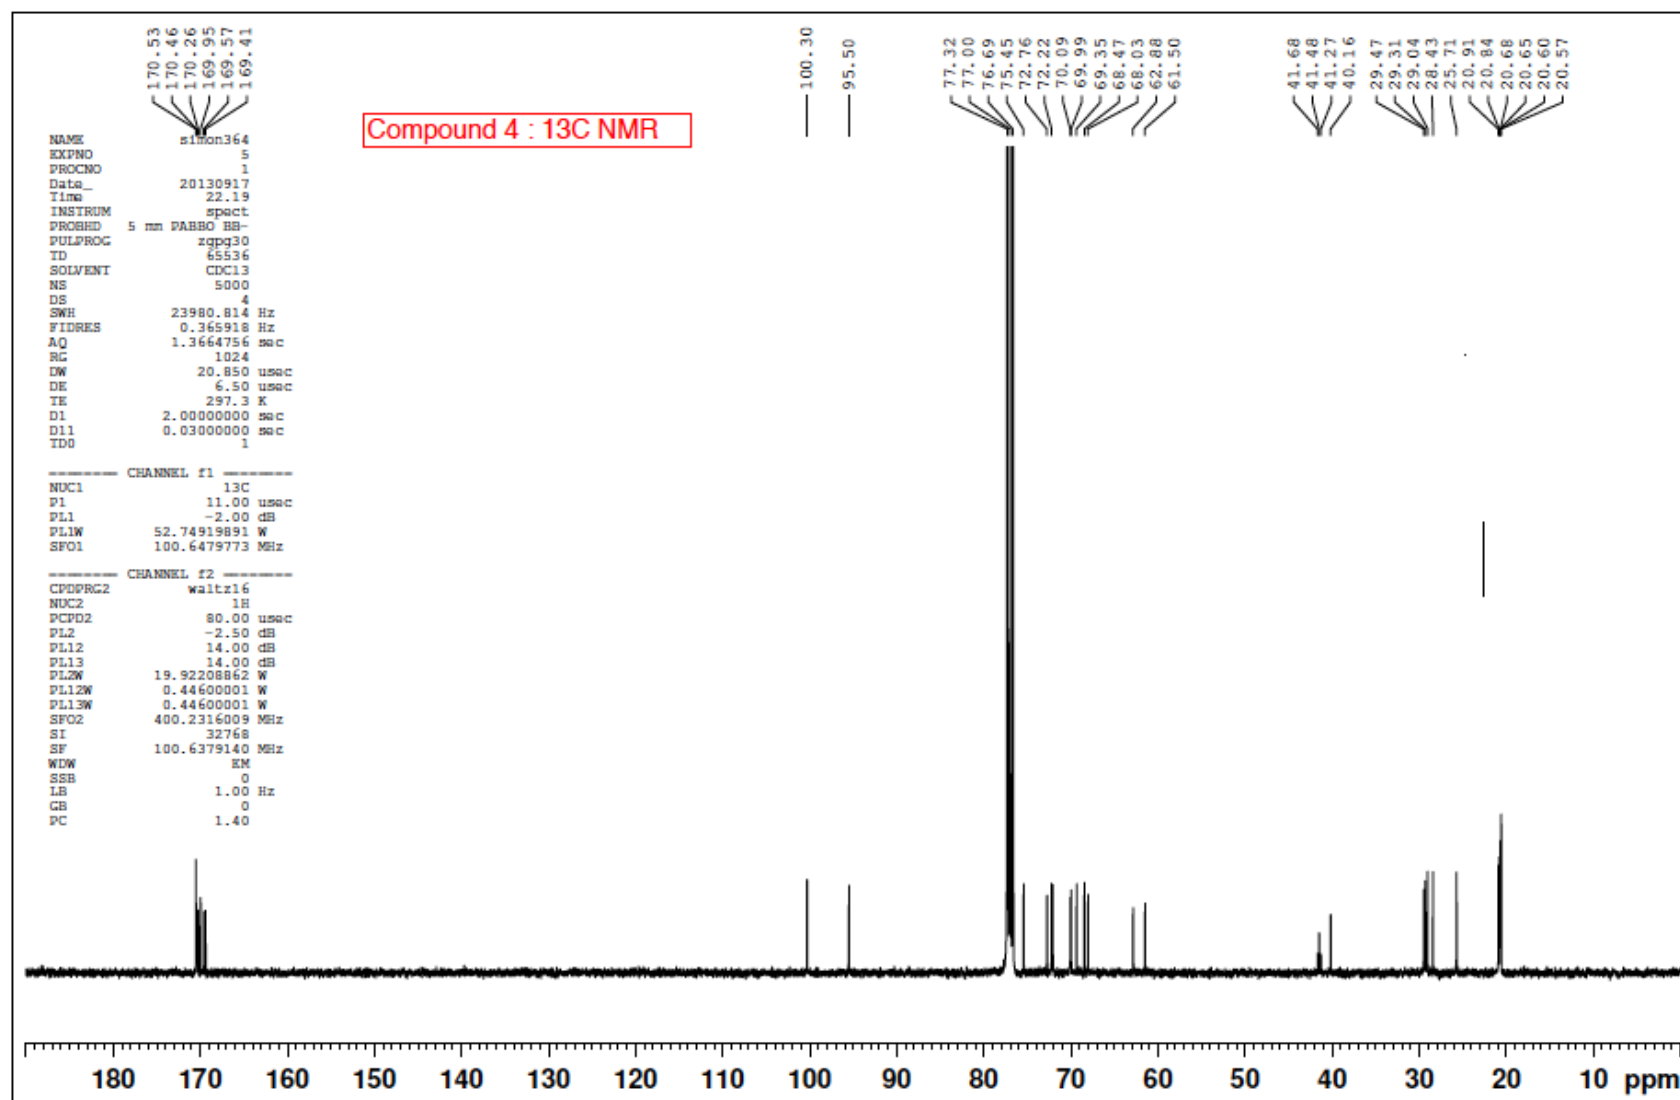

**$^1\text{H}$  NMR,  $^{19}\text{F}$  NMR and  $^{13}\text{C}$  NMR of compound 5**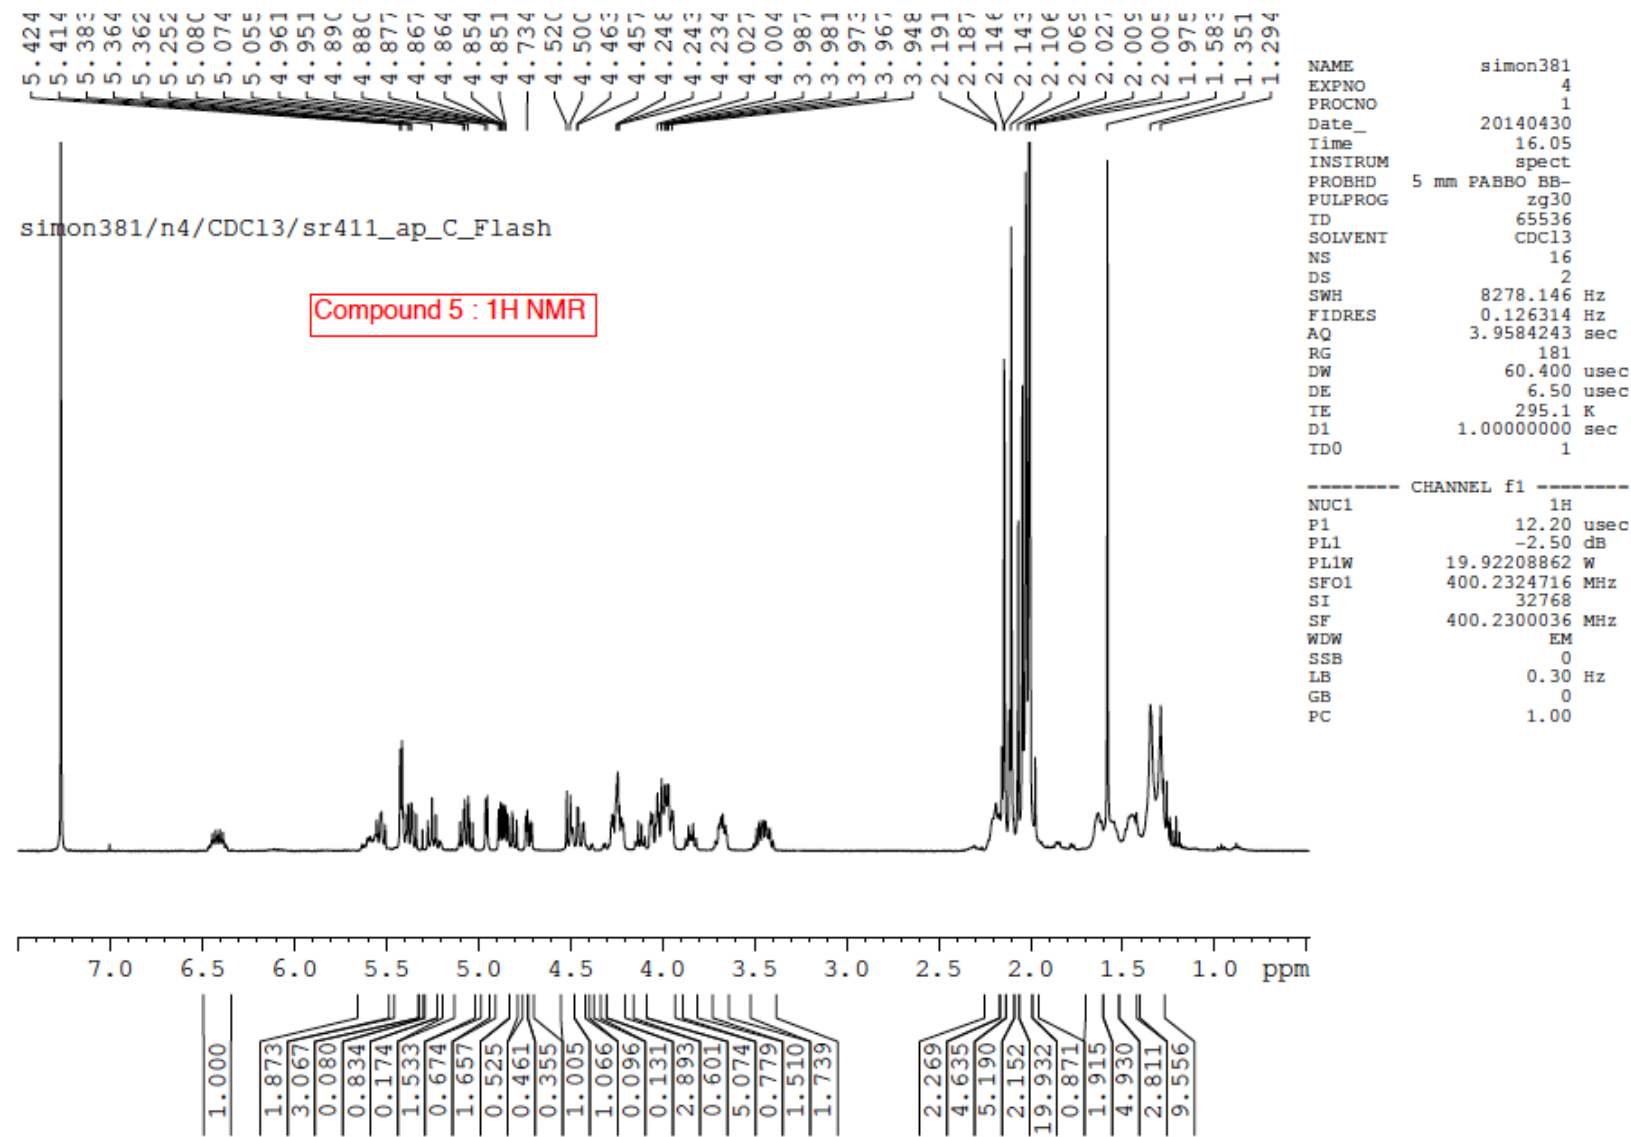



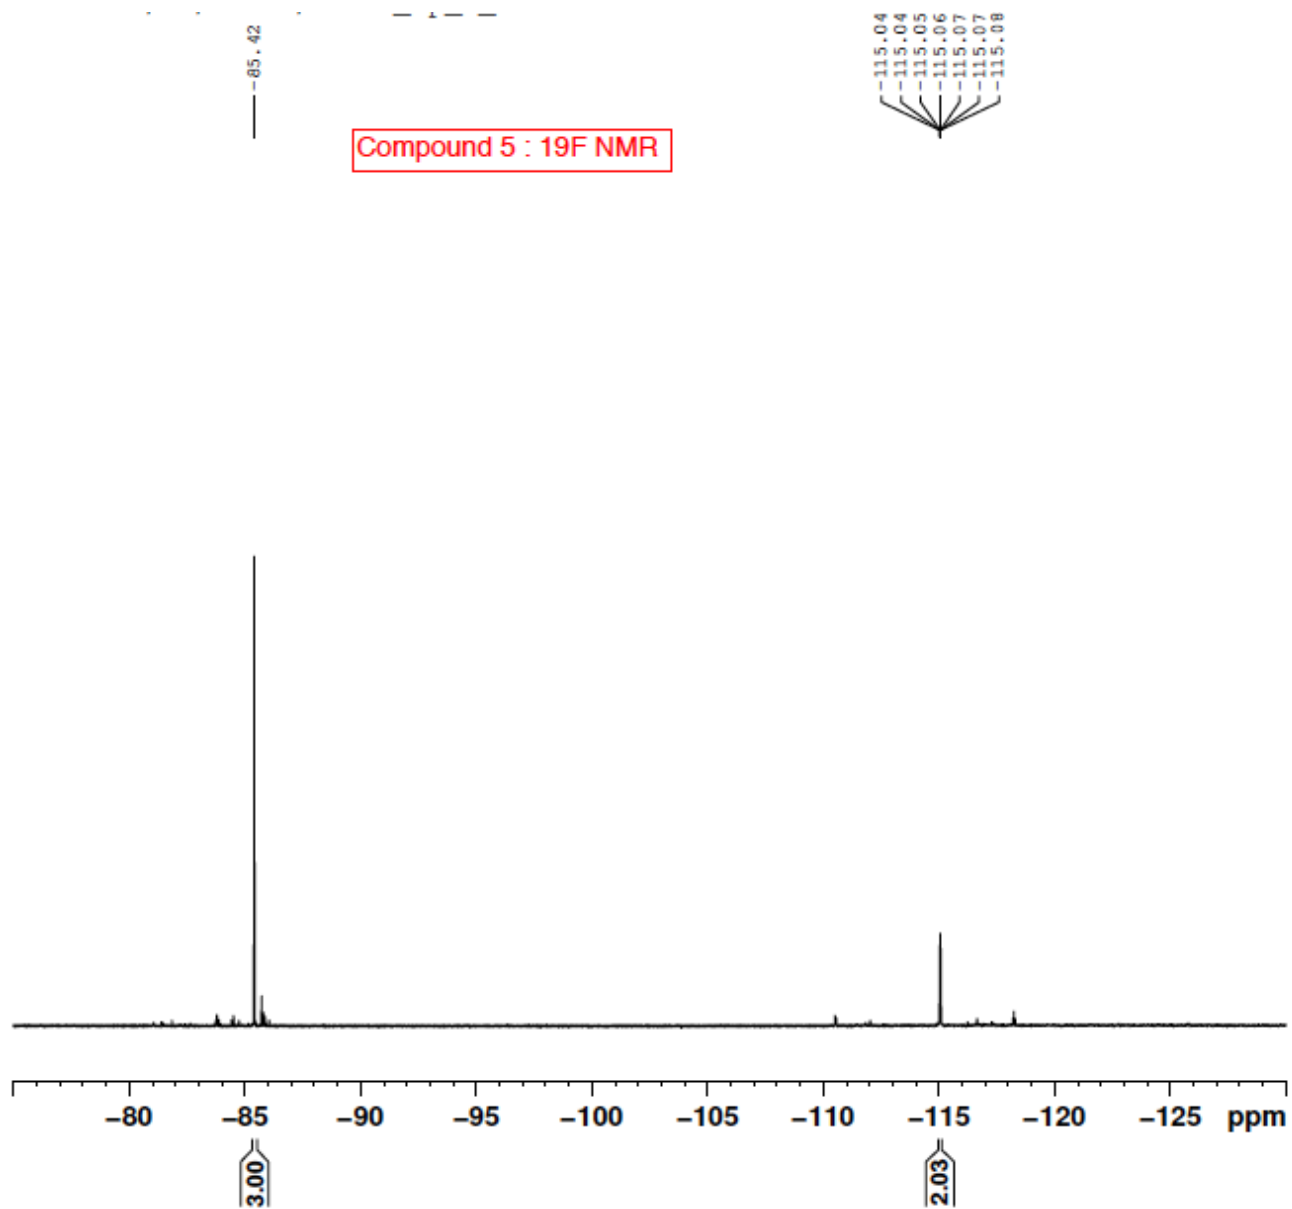

```

NAME          simon381
EXPNO         5
PROCNO       1
Date_        20140430
Time         16.08
INSTRUM      spect
PROBHD       5 mm PABBO BB-
PULPROG      zgfglqn
ID           131072
SOLVENT      CDC13
NS           16
DS           4
SWH          75187.969 Hz
FIDRES       0.573639 Hz
AQ           0.8716788 sec
RG           574.7
DW           6.650 usec
DE           6.50 usec
TE           295.0 K
D1           1.00000000 sec
ID0          1

```

```

----- CHANNEL f1 -----
NUC1          19F
P1            14.00 usec
PL1           -3.00 dB
PL1W          24.80876732 W
SFO1          376.5548010 MHz
SI            65536
SF            376.5924600 MHz
WDW           EM
SSB           0
LB            0.30 Hz
GB            0
PC            1.00

```

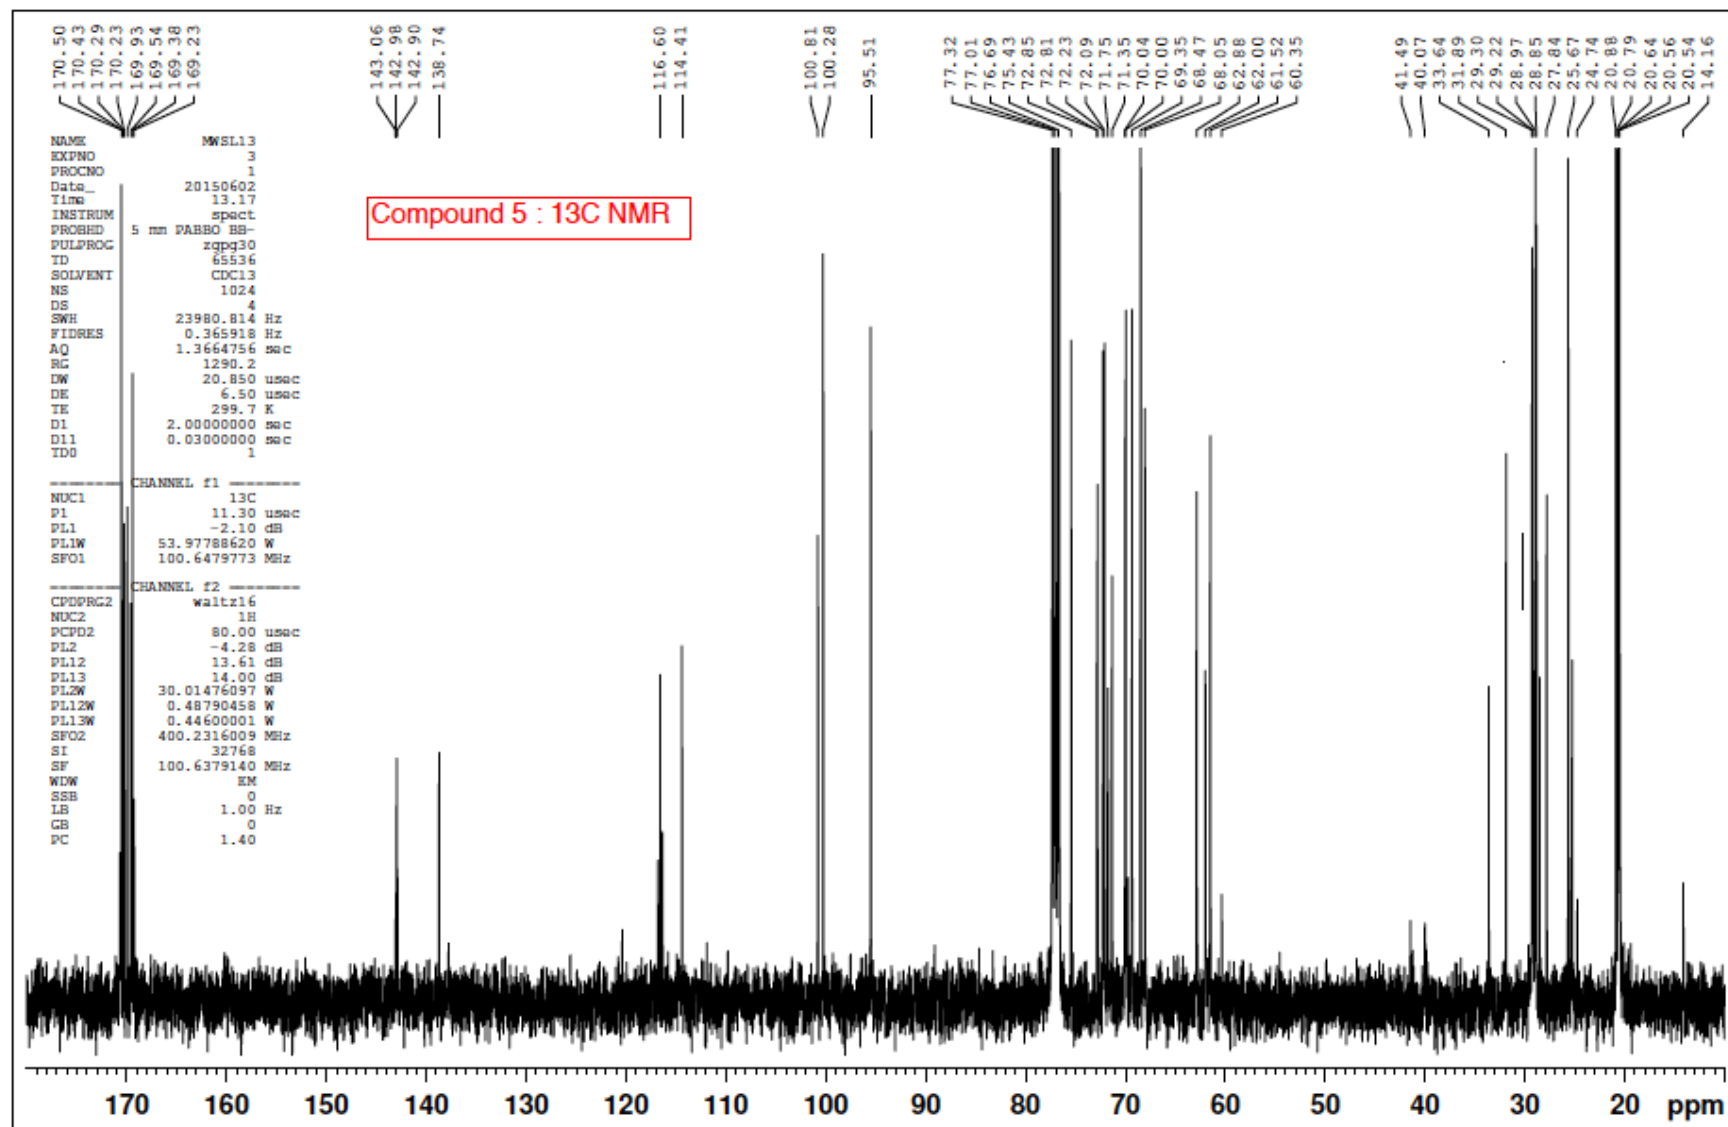

**$^1\text{H}$  NMR,  $^{19}\text{F}$  NMR and  $^{13}\text{C}$  NMR of compound 6**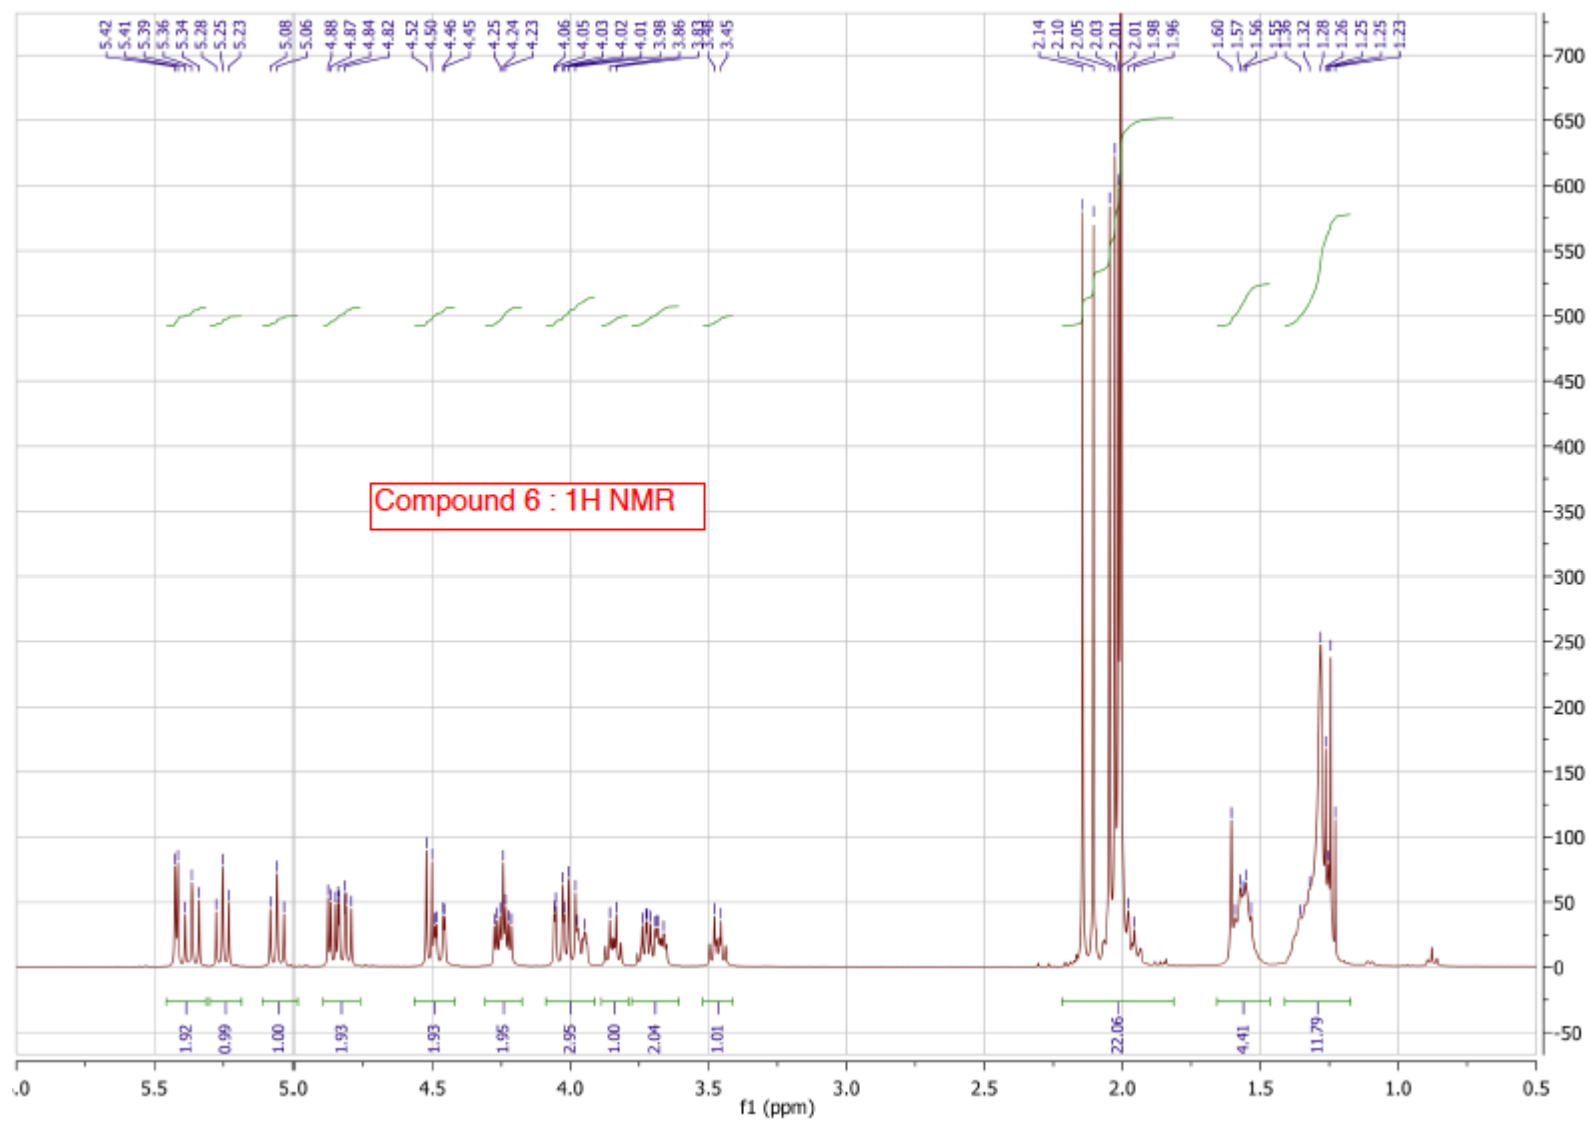

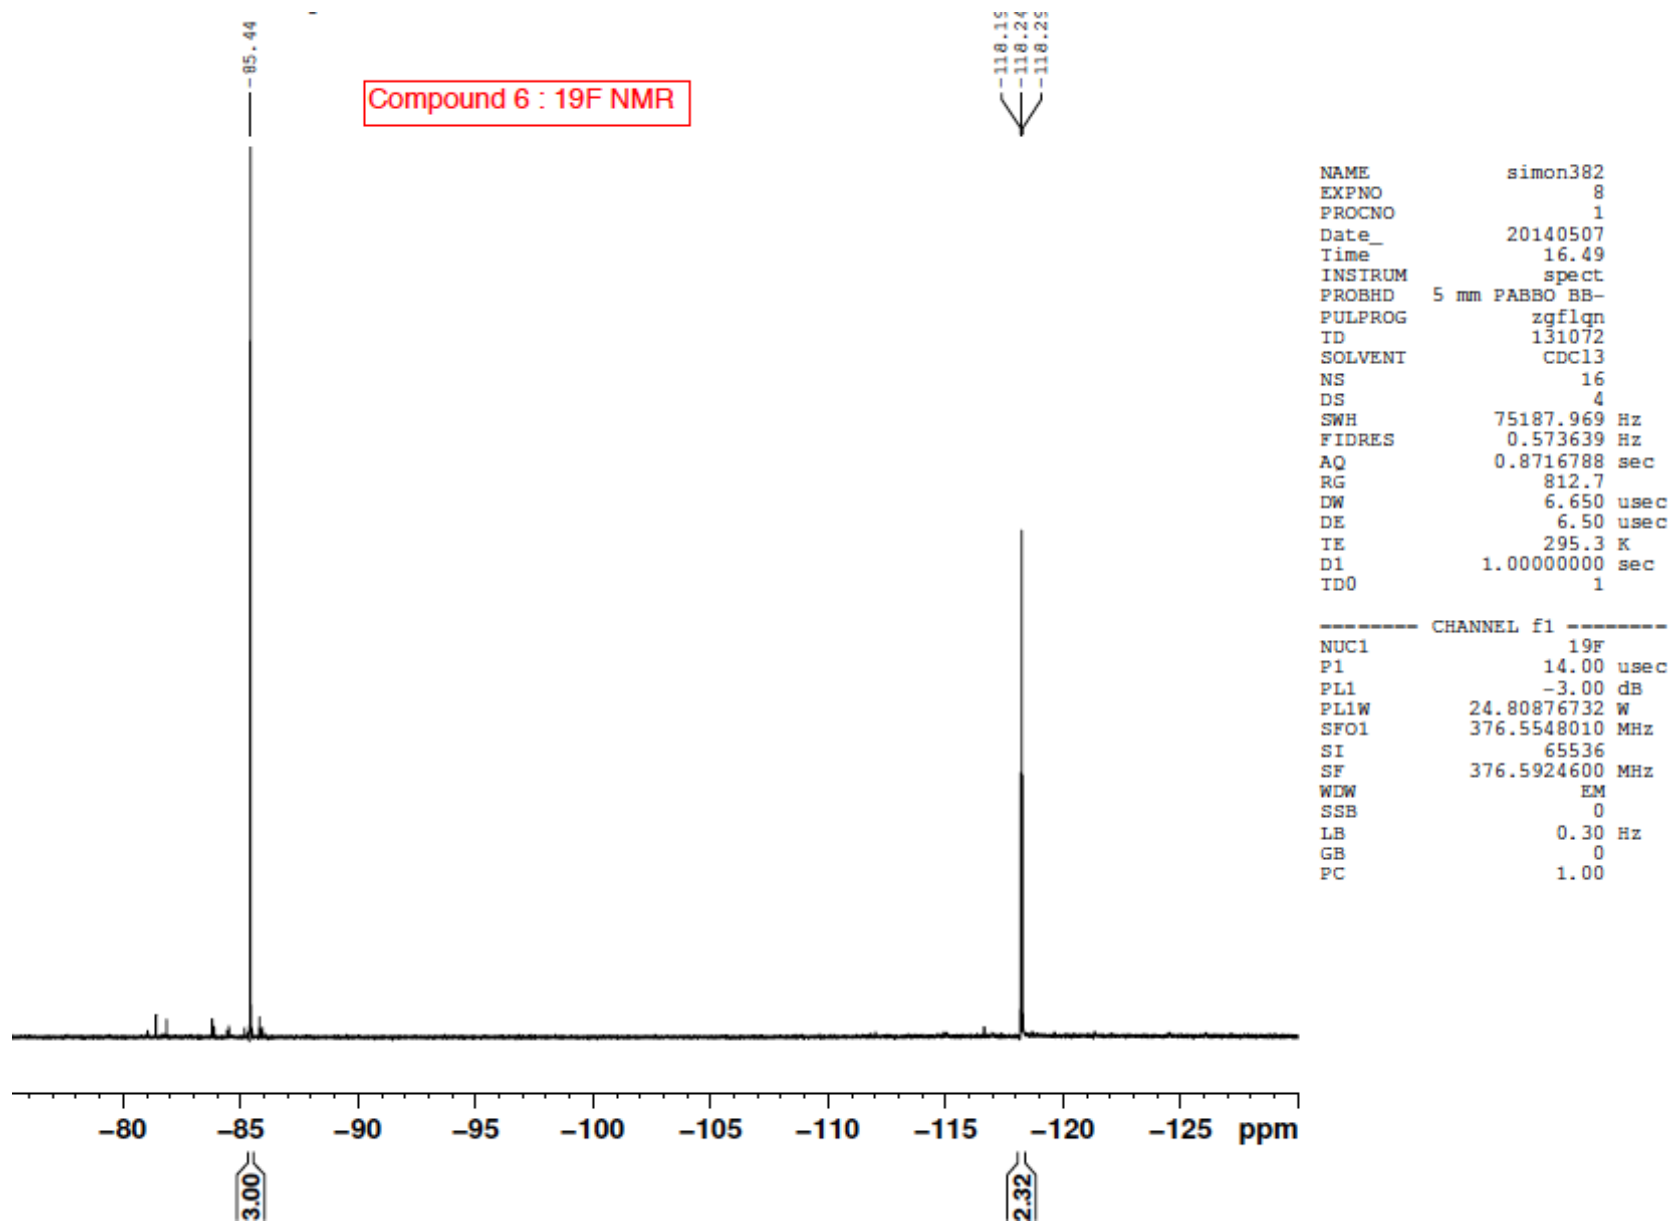

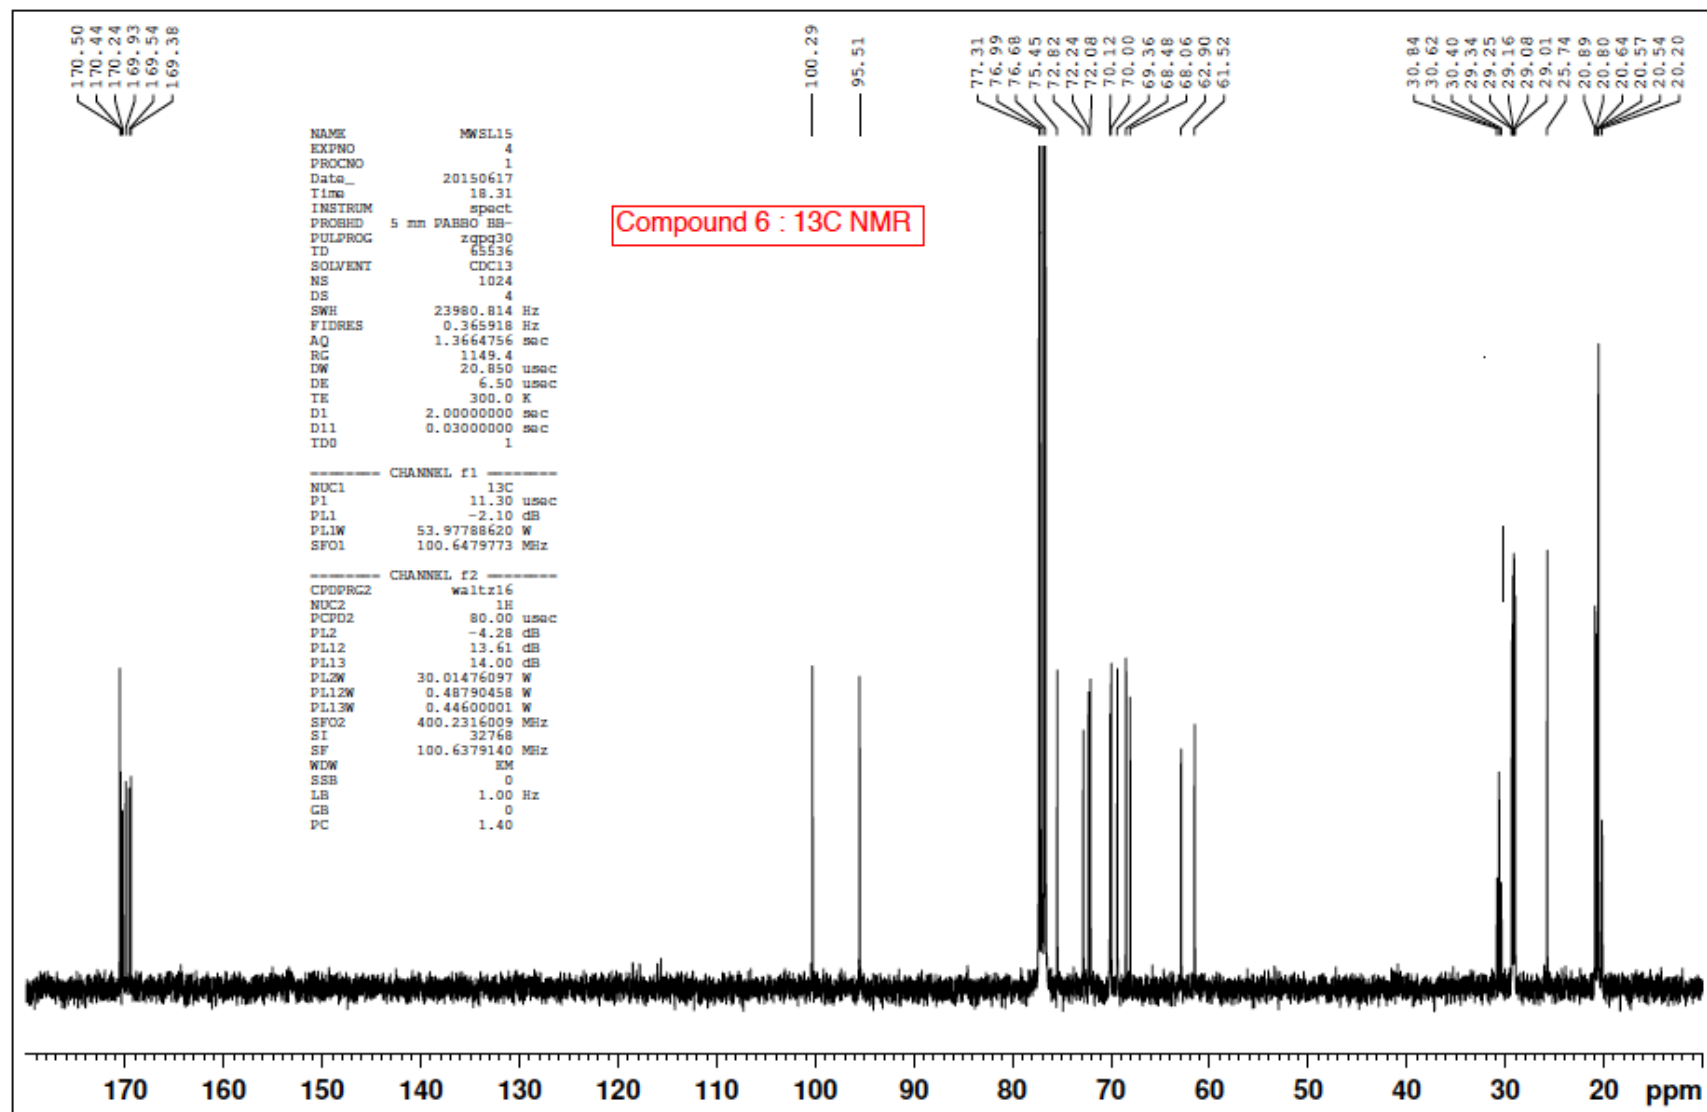

**$^1\text{H}$  NMR,  $^{19}\text{F}$  NMR and  $^{13}\text{C}$  NMR of F2H9Malt**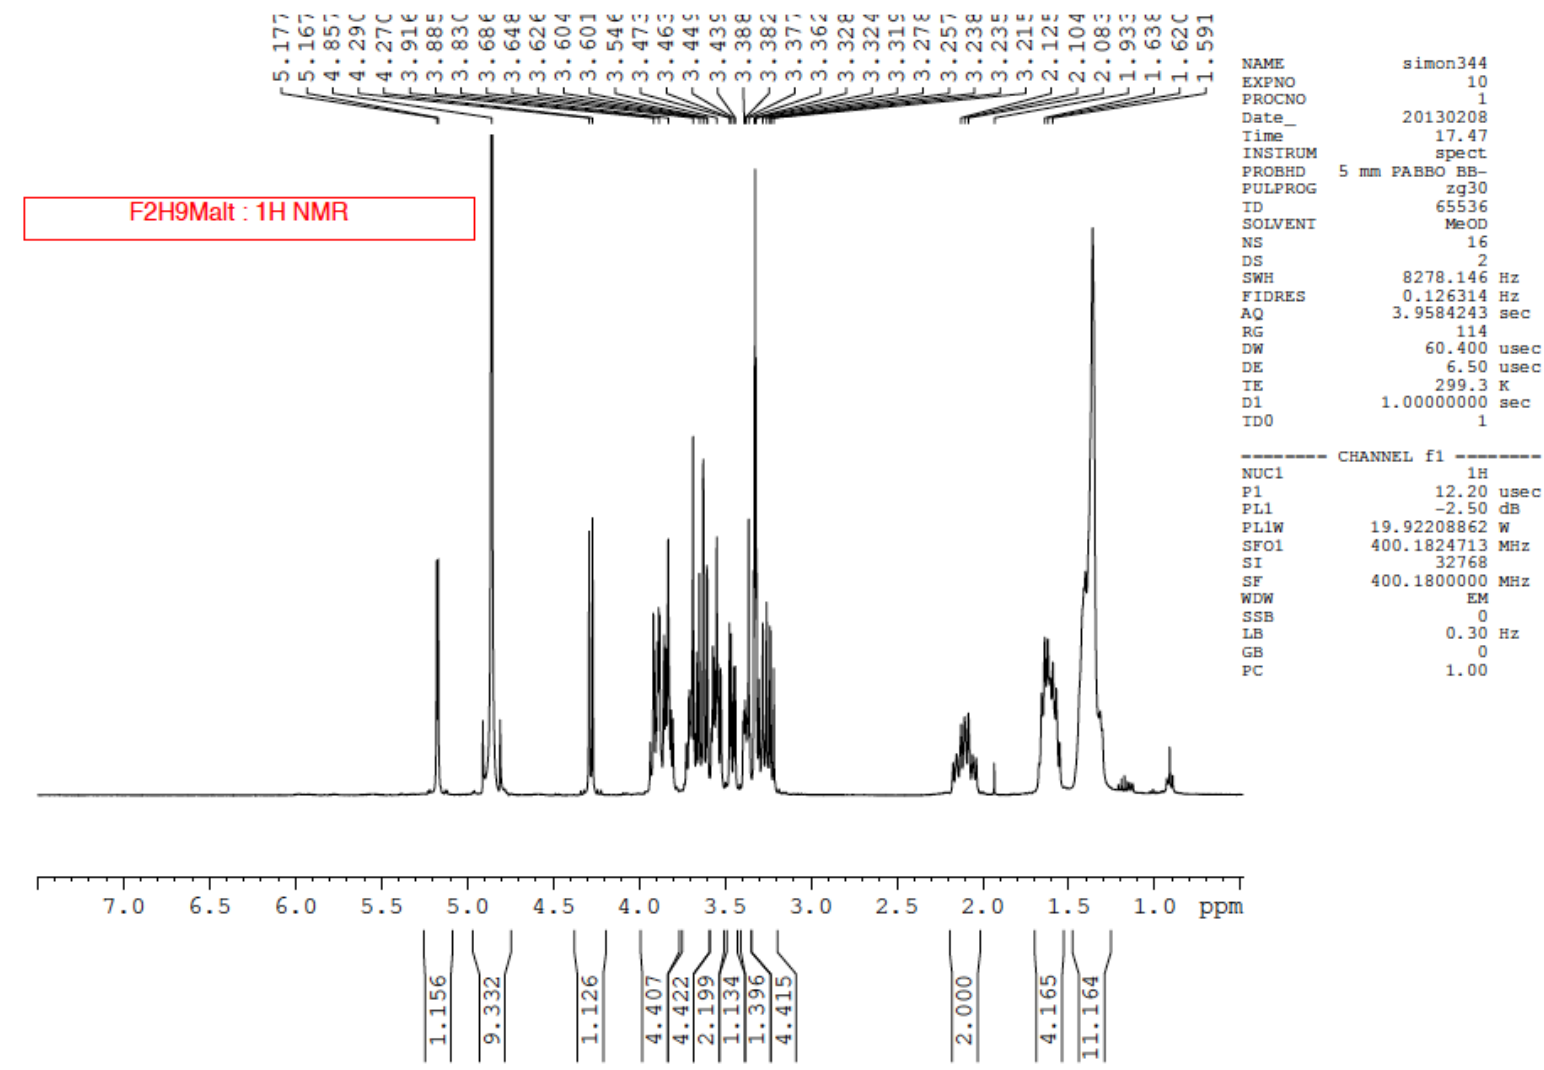

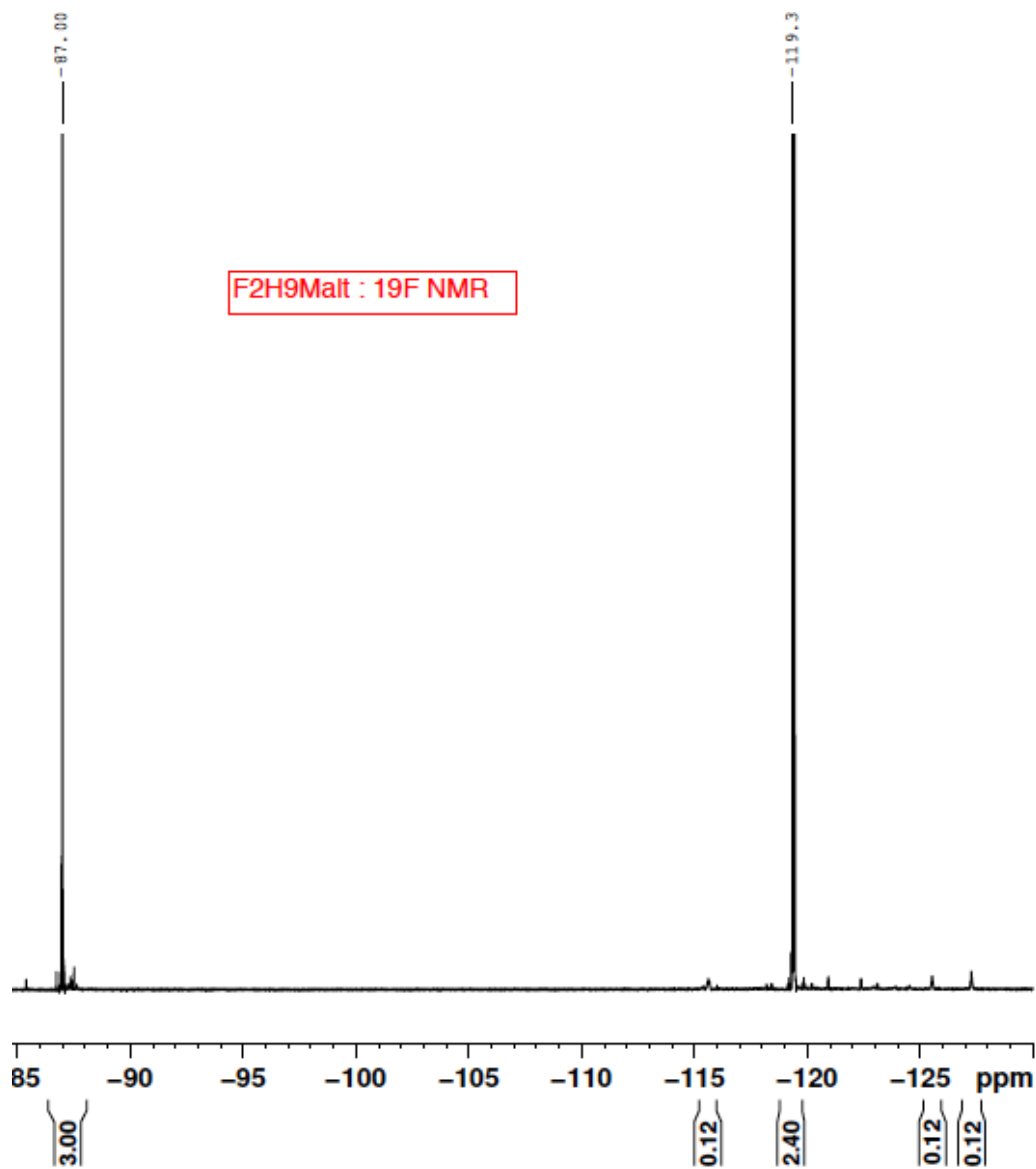

```

NAME          simon344
EXPNO         11
PROCNO        1
Date_         20130208
Time_         17.50
INSTRUM       spect
PROBHD        5 mm PABBO BB-
PULPROG       zgfglqn
ID            131072
SOLVENT       MeOD
NS            16
DS            4
SWH           75187.969 Hz
FIDRES        0.573639 Hz
AQ            0.8716788 sec
RG            645.1
DW            6.650 usec
DE            6.50 usec
TE            299.3 K
D1            1.00000000 sec
ID0           1

```

```

----- CHANNEL f1 -----
NUC1          19F
P1            14.00 usec
PL1           -3.00 dB
PL1W         24.80876732 W
SFO1         376.5077587 MHz
SI            65536
SF           376.5454130 MHz
WDW           EM
SSB           0
LB            0.30 Hz
GB            0
PC            1.00

```

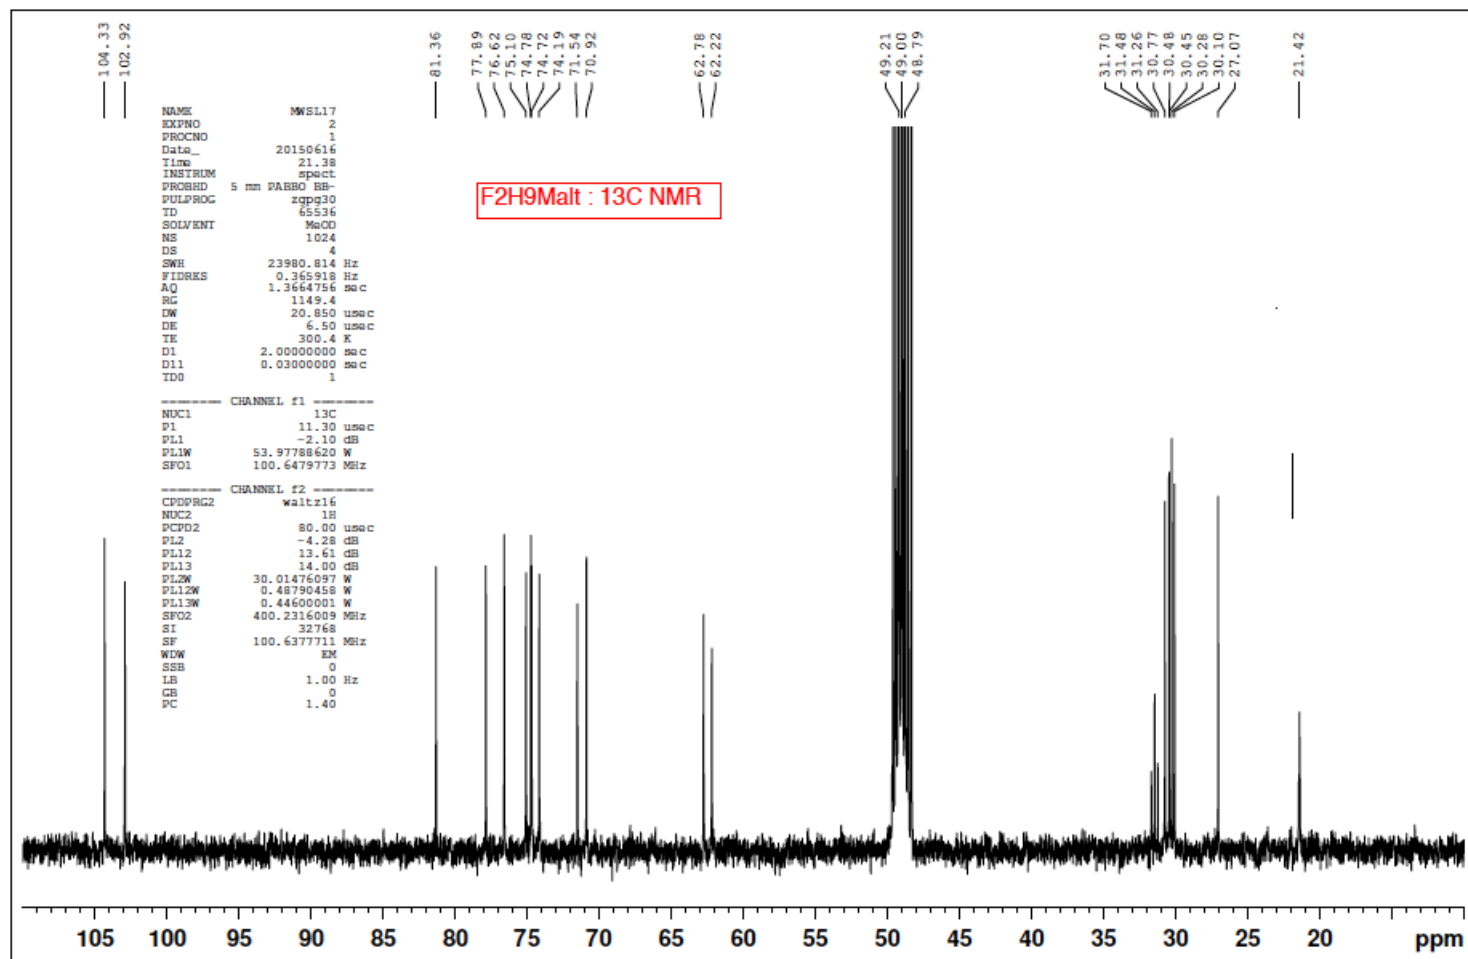



**Figure S1.** Superposition of selected experimental and fitted sedimentation velocity profiles acquired every  $\sim 20$  min during 4 h at  $130'000$  g (top) and residuals (bottom), for of  $F_2H_9M$  (A),  $F_4H_5M$  (B), and  $F_6H_2M$  (C) at 2 g/L in water at  $20^\circ C$ , using interference optics, after subtraction of the systematic noises and of the  $c(s)$  results obtained at the indicated concentrations (D–F).

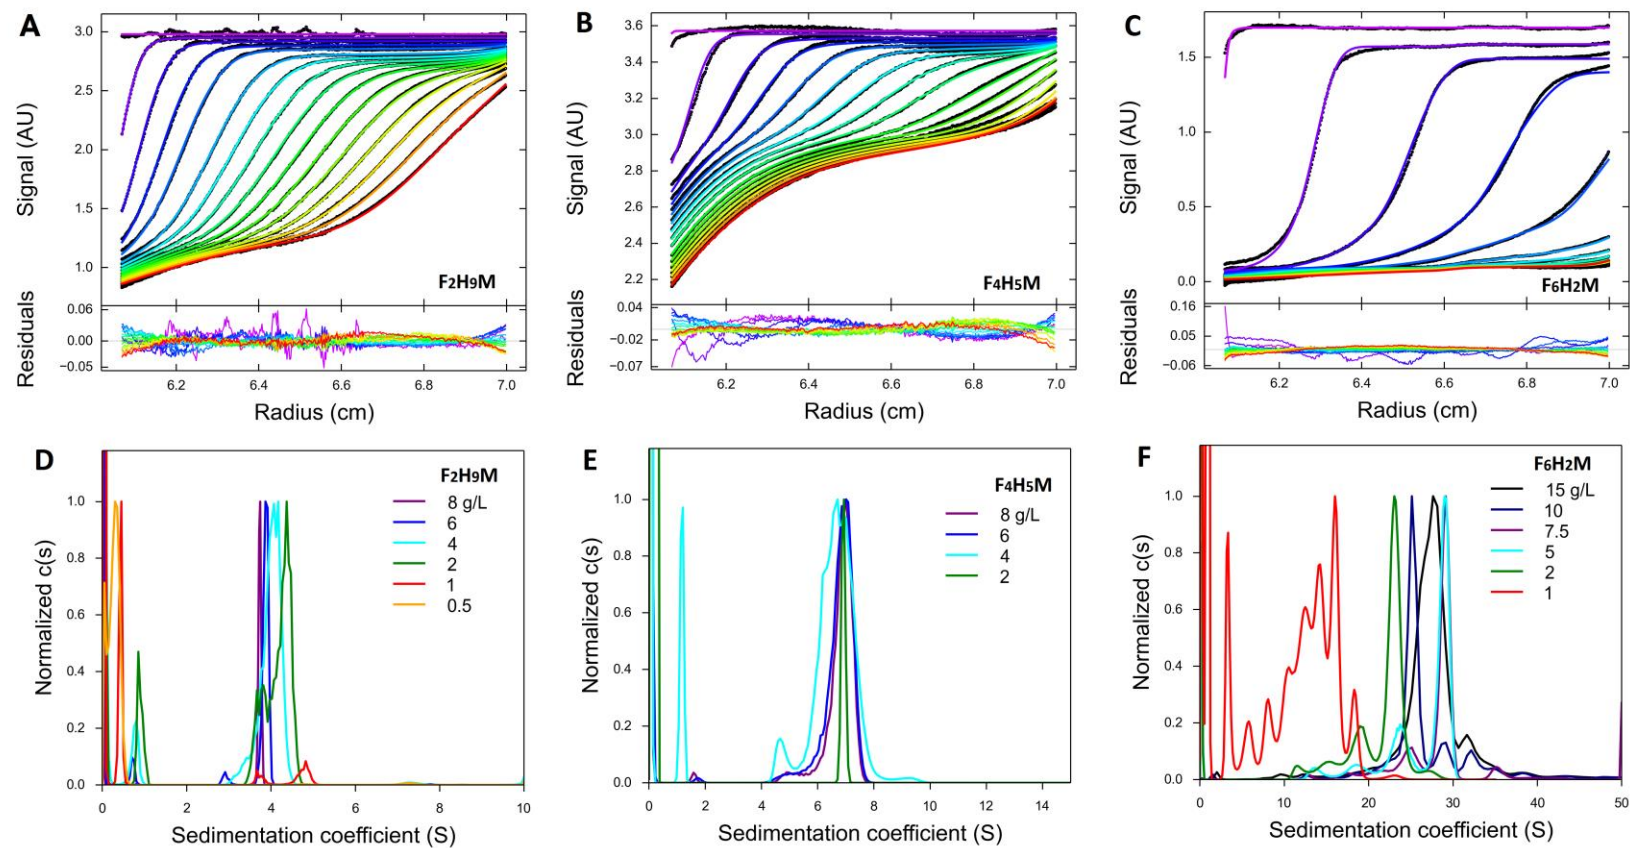

**Figure S2.** Autocorrelation functions  $G(t)$  (A,D,G) and size distributions weighted by intensity (B,E,H) or volume (C,F,I) for  $F_2H_9\beta M$ ,  $F_4H_5\beta M$ , and  $F_6H_2\beta M$  in water.

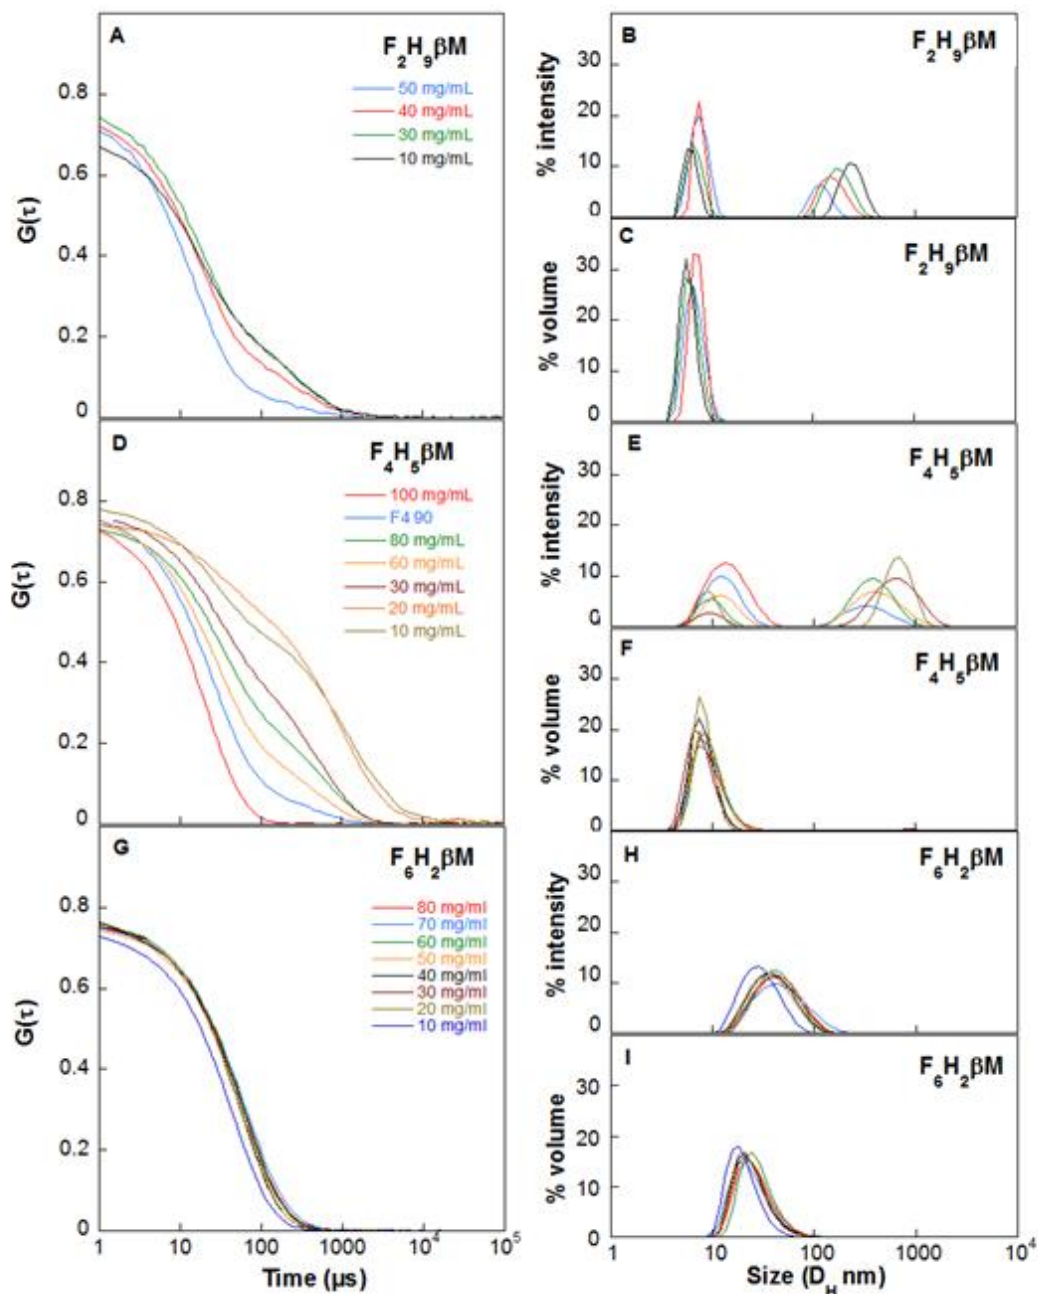

**Figure S3.** SAXS patterns (top) and pair distribution functions (bottom) for  $F_2H_9\beta M$  (A,C),  $F_4H_5\beta M$  (B,E), and  $F_6H_2\beta M$  (C,F) in water.

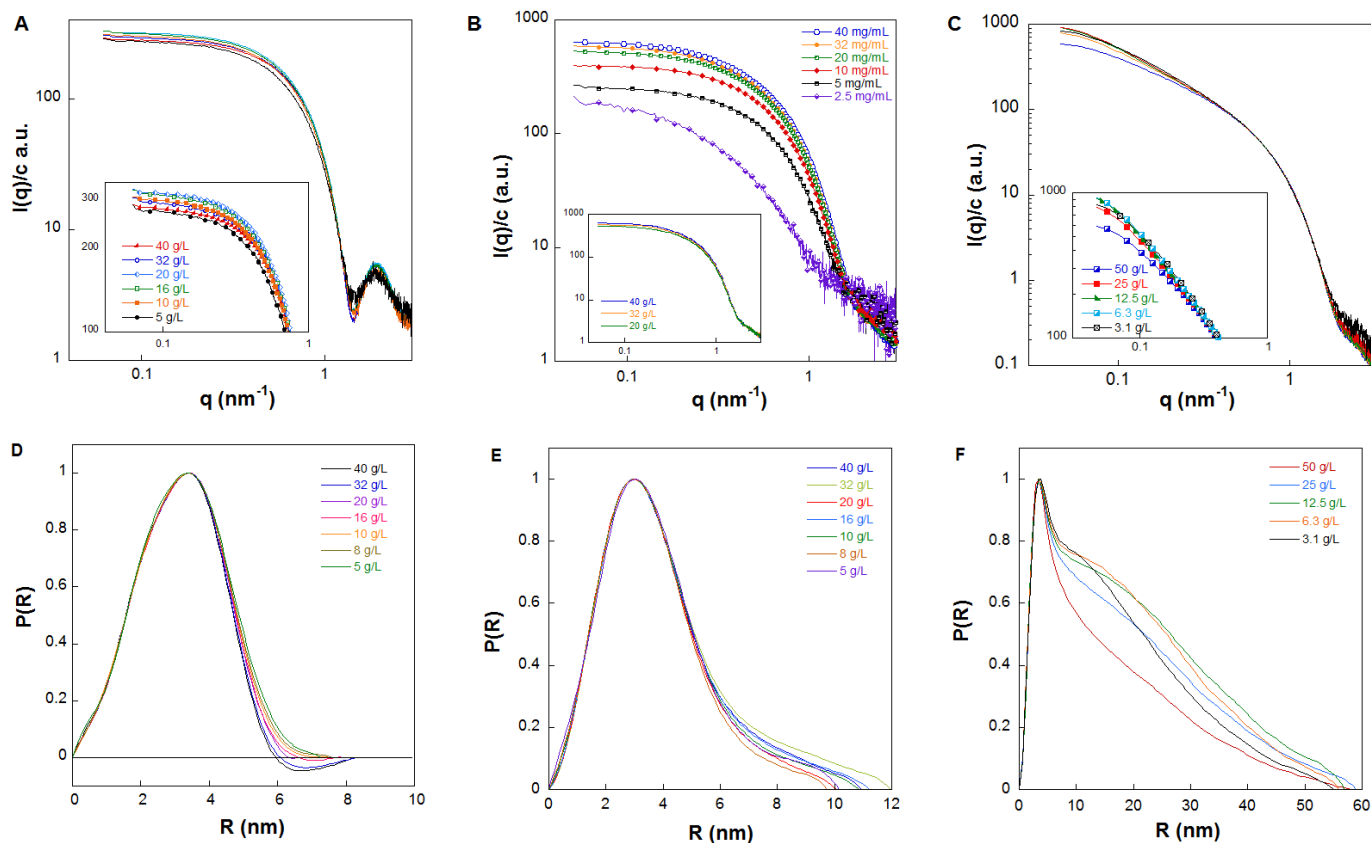

**Figure S4.** Forward intensity  $I(0)$  as a function of total surfactant concentration for  $F_2H_9\beta M$ ,  $F_4H_5\beta M$ , and  $F_6H_2\beta M$  for CMC determination.

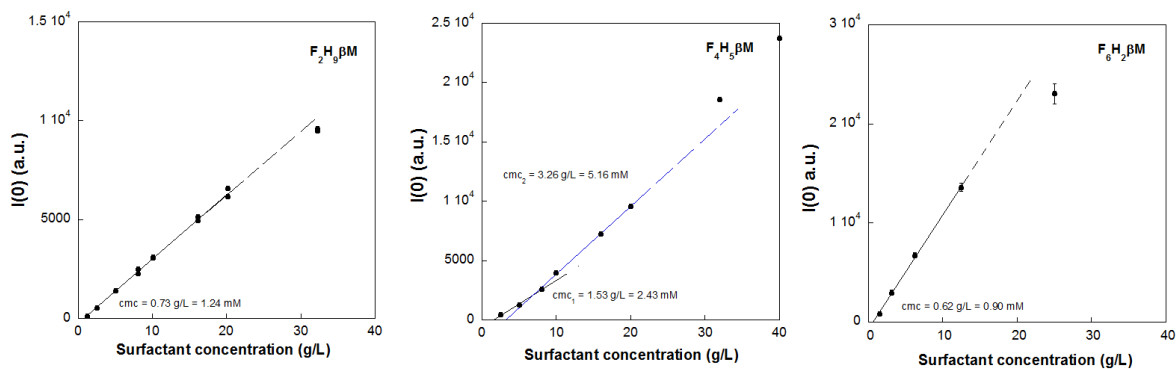

Table S1. Surfactant properties.

| Surfactant (abbreviation)                                                   | H <sub>12</sub> βM                              | F <sub>2</sub> H <sub>9</sub> βM                               | F <sub>4</sub> H <sub>5</sub> βM                               | F <sub>6</sub> H <sub>2</sub> βM                                |
|-----------------------------------------------------------------------------|-------------------------------------------------|----------------------------------------------------------------|----------------------------------------------------------------|-----------------------------------------------------------------|
| Formula                                                                     | C <sub>24</sub> H <sub>46</sub> O <sub>11</sub> | C <sub>23</sub> H <sub>39</sub> F <sub>5</sub> O <sub>11</sub> | C <sub>21</sub> H <sub>31</sub> F <sub>9</sub> O <sub>11</sub> | C <sub>20</sub> H <sub>25</sub> F <sub>13</sub> O <sub>11</sub> |
| Formula molar mass (g/mol)                                                  | 510.6                                           | 586.5                                                          | 630.5                                                          | 688.4                                                           |
| Head formula                                                                | C <sub>12</sub> H <sub>21</sub> O <sub>11</sub> | C <sub>12</sub> H <sub>21</sub> O <sub>11</sub>                | C <sub>12</sub> H <sub>21</sub> O <sub>11</sub>                | C <sub>12</sub> H <sub>21</sub> O <sub>11</sub>                 |
| Head molar mass (g/mol)                                                     | 341.3                                           | 341.3                                                          | 341.3                                                          | 341.3                                                           |
| Chain formula                                                               | C <sub>12</sub> H <sub>25</sub>                 | C <sub>11</sub> H <sub>18</sub> F <sub>5</sub>                 | C <sub>9</sub> H <sub>10</sub> F <sub>9</sub>                  | C <sub>8</sub> H <sub>4</sub> F <sub>13</sub>                   |
| Chain molar mass (g/mol)                                                    | 169.3                                           | 245.2                                                          | 289.2                                                          | 347.1                                                           |
| CMC from TS (mM / gL <sup>-1</sup> )                                        | 0.17 / 0.087                                    | 1.14 / 0.67                                                    | 2.16 / 1.36                                                    | 0.71 / 0.49                                                     |
| ∂n/∂c (mL/g) from AUC                                                       |                                                 | 0.107                                                          | 0.078                                                          | 0.071                                                           |
| ε <sub>0.1%</sub> L/(g cm) from AUC                                         |                                                 | 0.012                                                          | 0.07                                                           | 0.009                                                           |
| $\bar{V}$ (cm <sup>3</sup> g <sup>-1</sup> ) from density meas.             | 0.819                                           | 0.749                                                          | 0.632                                                          | 0.578                                                           |
| $\bar{V}$ (cm <sup>3</sup> g <sup>-1</sup> ) from composition               |                                                 | 0.718                                                          | 0.629                                                          | 0.564                                                           |
| V <sub>monomer</sub> (Å <sup>3</sup> ) from density meas.                   | 694.4                                           | 729.4                                                          | 661.5                                                          | 660.6                                                           |
| V <sub>head</sub> (Å <sup>3</sup> ) from chem. formula                      | 348                                             | 348                                                            | 348                                                            | 348                                                             |
| V <sub>chain</sub> (Å <sup>3</sup> ) from chem. formula                     | 346.5                                           | 381.4                                                          | 313.5                                                          | 312.6                                                           |
| Total number of electrons                                                   | 278                                             | 310                                                            | 326                                                            | 350                                                             |
| Head number of electrons                                                    | 181                                             | 181                                                            | 181                                                            | 181                                                             |
| Chain number of electrons                                                   | 97                                              | 129                                                            | 145                                                            | 169                                                             |
| ρ <sup>elect</sup> (e <sup>-</sup> / Å <sup>3</sup> ) from density meas.    | 0.400                                           | 0.425                                                          | 0.493                                                          | 0.529                                                           |
| ρ <sup>elect</sup> (e <sup>-</sup> / Å <sup>3</sup> ) for polar head        | 0.520                                           | 0.520                                                          | 0.520                                                          | 0.520                                                           |
| ρ <sup>elect</sup> (e <sup>-</sup> / Å <sup>3</sup> ) for hydrophobic chain | 0.280                                           | 0.338                                                          | 0.462                                                          | 0.541                                                           |
| ρ <sup>elect</sup> (e <sup>-</sup> / Å <sup>3</sup> ) for H <sub>2</sub> O  | 0.334                                           | 0.334                                                          | 0.334                                                          | 0.334                                                           |
| <i>Data from SAXS</i>                                                       |                                                 |                                                                |                                                                |                                                                 |
| M <sub>w</sub> (kDa)                                                        | 65                                              | 38                                                             | 32                                                             | >500                                                            |
| N <sub>agg</sub> from I(0)                                                  | 125                                             | 65                                                             | 50                                                             | >700                                                            |
| R <sub>G</sub> (nm)                                                         | 3.2                                             | 2.5                                                            | 3.2                                                            | 15.8                                                            |
| <i>Data from DLS</i>                                                        |                                                 |                                                                |                                                                |                                                                 |
| D <sub>max</sub> (nm)                                                       | 8.0                                             | 7.6                                                            | 10.8                                                           | 57                                                              |
| R <sub>H</sub> (nm)                                                         | 3.6                                             | 2.7                                                            | 4.6                                                            | 15.6                                                            |
| <i>Data from SV*</i>                                                        |                                                 |                                                                |                                                                |                                                                 |
| k' <sub>s</sub> mL/g                                                        |                                                 | -17 +/- 2                                                      | 0 +/- 3                                                        |                                                                 |
| S <sub>0</sub> , S <sub>max</sub> * S                                       |                                                 | 4.20 +/- 0.02                                                  | 6.83 +/- 0.1                                                   | 0.28 +/- 0.1*                                                   |
| N <sub>agg</sub>                                                            |                                                 | 87                                                             | 154                                                            | 1750*                                                           |
| f/f <sub>min</sub>                                                          |                                                 | 1.1                                                            | 1.6                                                            | 2.4*                                                            |

\*N<sub>agg</sub> and f/f<sub>min</sub> are derived from the related s and R<sub>H</sub> from DLS.
